# Supplementary material for: Diverse nucleosome Site-Selectivity among histone deacetylase complexes
Source: eLife journal article supplement (doi:10.7554/elife.57663), 2020-06-05
Supplement: supp [file elife-57663-supp-v1.zip]

Archive with 16 entries (16 files):
- elife_poa_e57663_Transparent_Reporting_File.pdf
- elife_poa_e57663_Figure_2_figure_supplement_1.jpg
- elife_poa_e57663_Figure_2_figure_supplement_2.jpg
- elife_poa_e57663_Figure_2_figure_supplement_3.jpg
- elife_poa_e57663_Figure_3_figure_supplement_1.jpg
- elife_poa_e57663_Figure_3_figure_supplement_2.jpg
- elife_poa_e57663_Figure_4_figure_supplement_1.jpg
- elife_poa_e57663_Figure_4_figure_supplement_2.jpg
- elife_poa_e57663_Figure_4_figure_supplement_3.jpg
- elife_poa_e57663_Figure_4_figure_supplement_4.jpg
- elife_poa_e57663_Figure_4_figure_supplement_5.jpg
- elife_poa_e57663_Figure_4_figure_supplement_6.jpg
- elife_poa_e57663_Figure_5_figure_supplement_1.jpg
- elife_poa_e57663_Figure_5_figure_supplement_2.jpg
- elife_poa_e57663_Figure_5_figure_supplement_3.jpg
- elife_poa_e57663_Figure_6_figure_supplement_1.jpg
