# Supplementary figures and images for: Diverse nucleosome Site-Selectivity among histone deacetylase complexes
Source: eLife journal article supplement (doi:10.7554/elife.57663), 2020-06-05

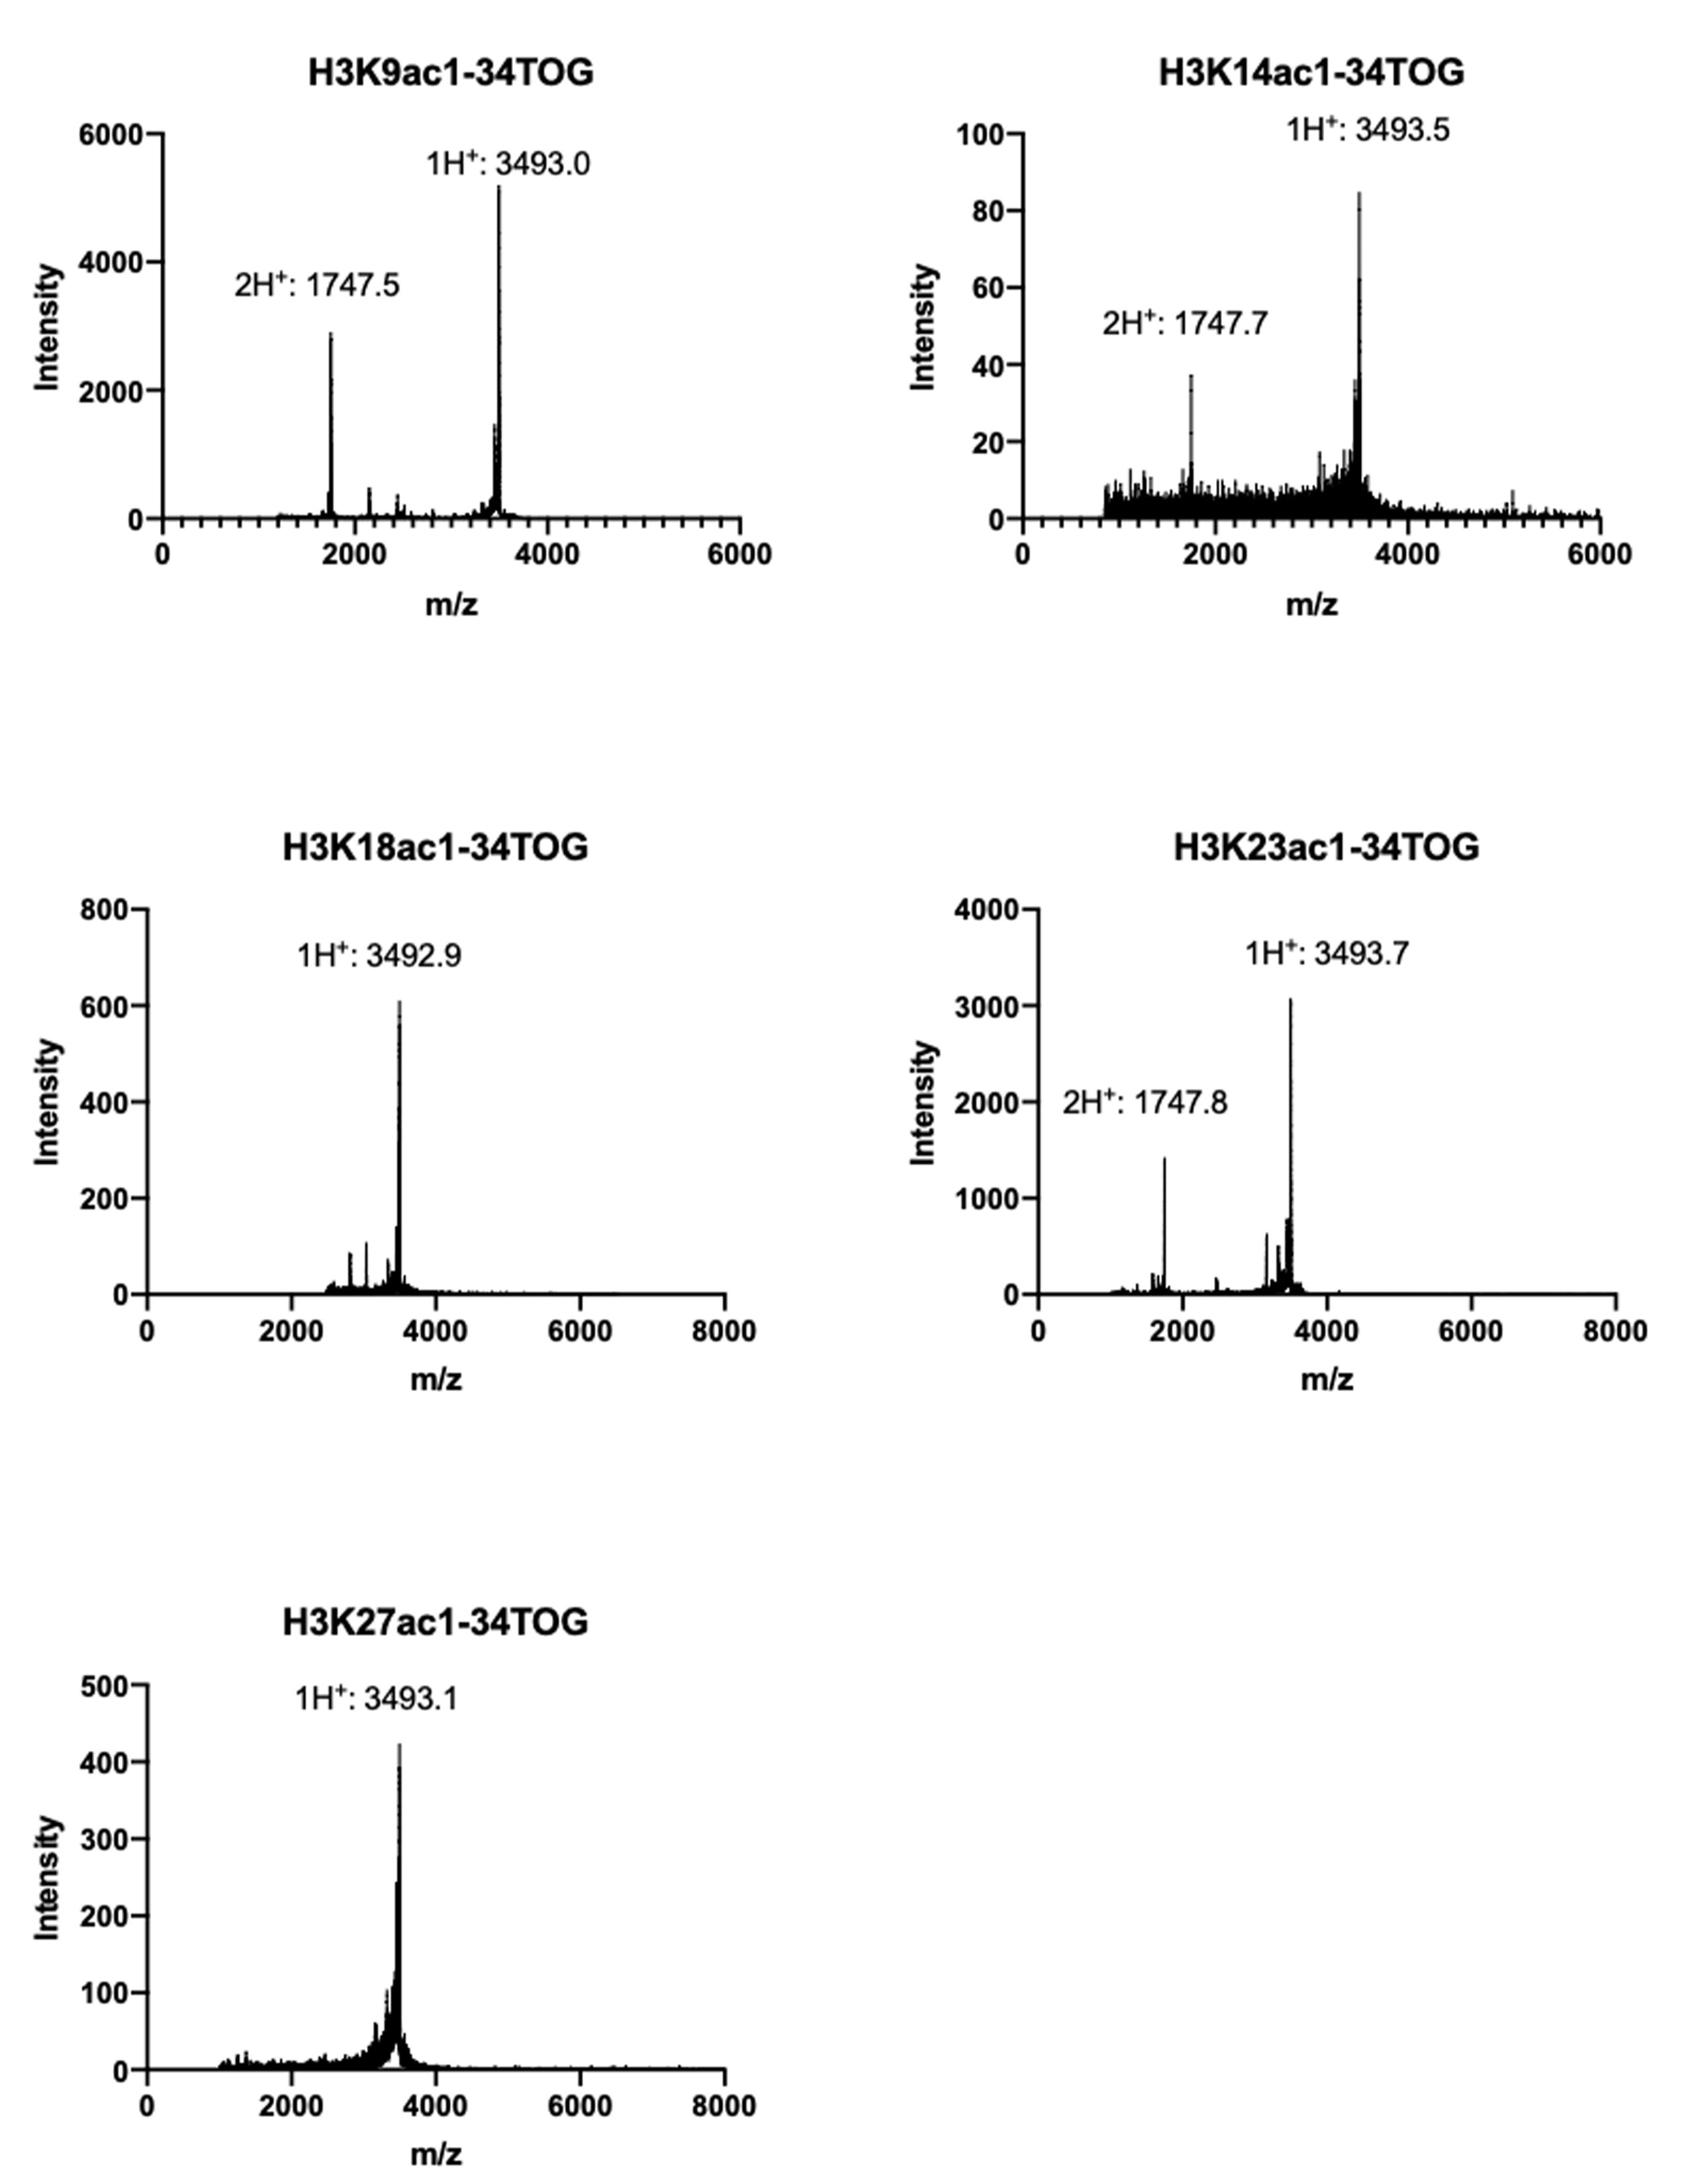

Supplement: supp [file elife-57663-supp-v1.zip › elife_poa_e57663_Figure_2_figure_supplement_1.jpg]

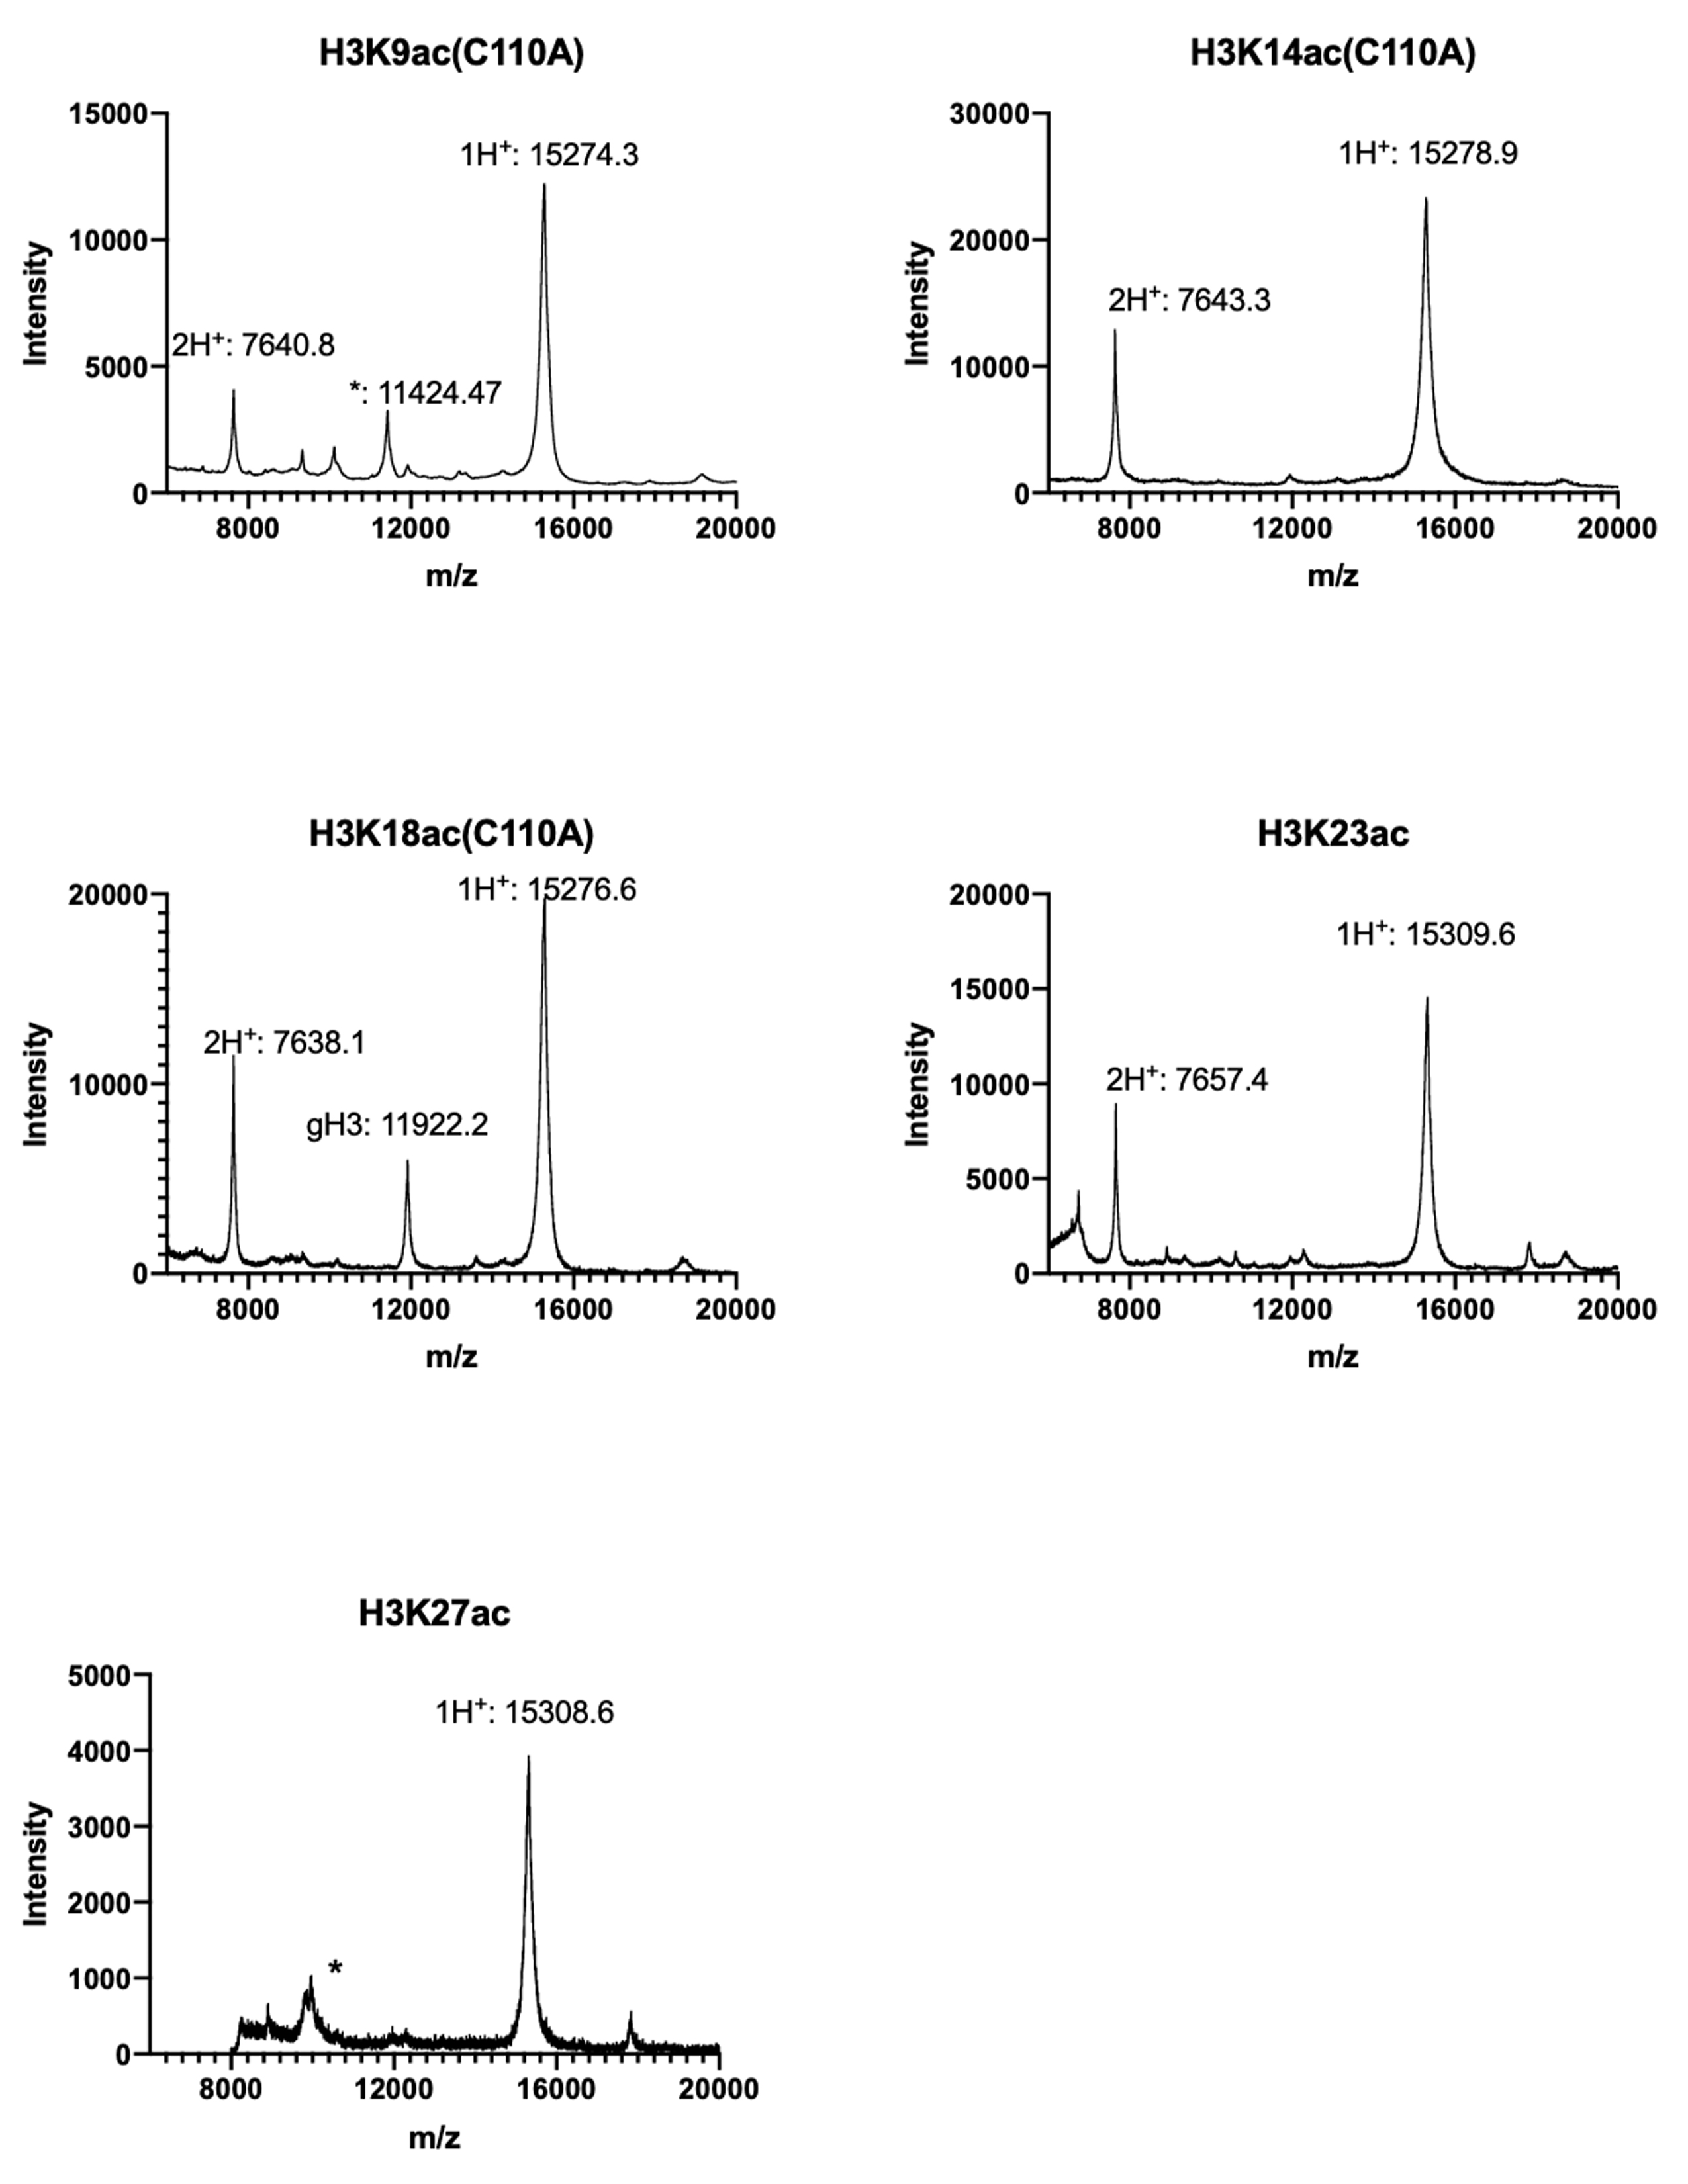

Supplement: supp [file elife-57663-supp-v1.zip › elife_poa_e57663_Figure_2_figure_supplement_2.jpg]

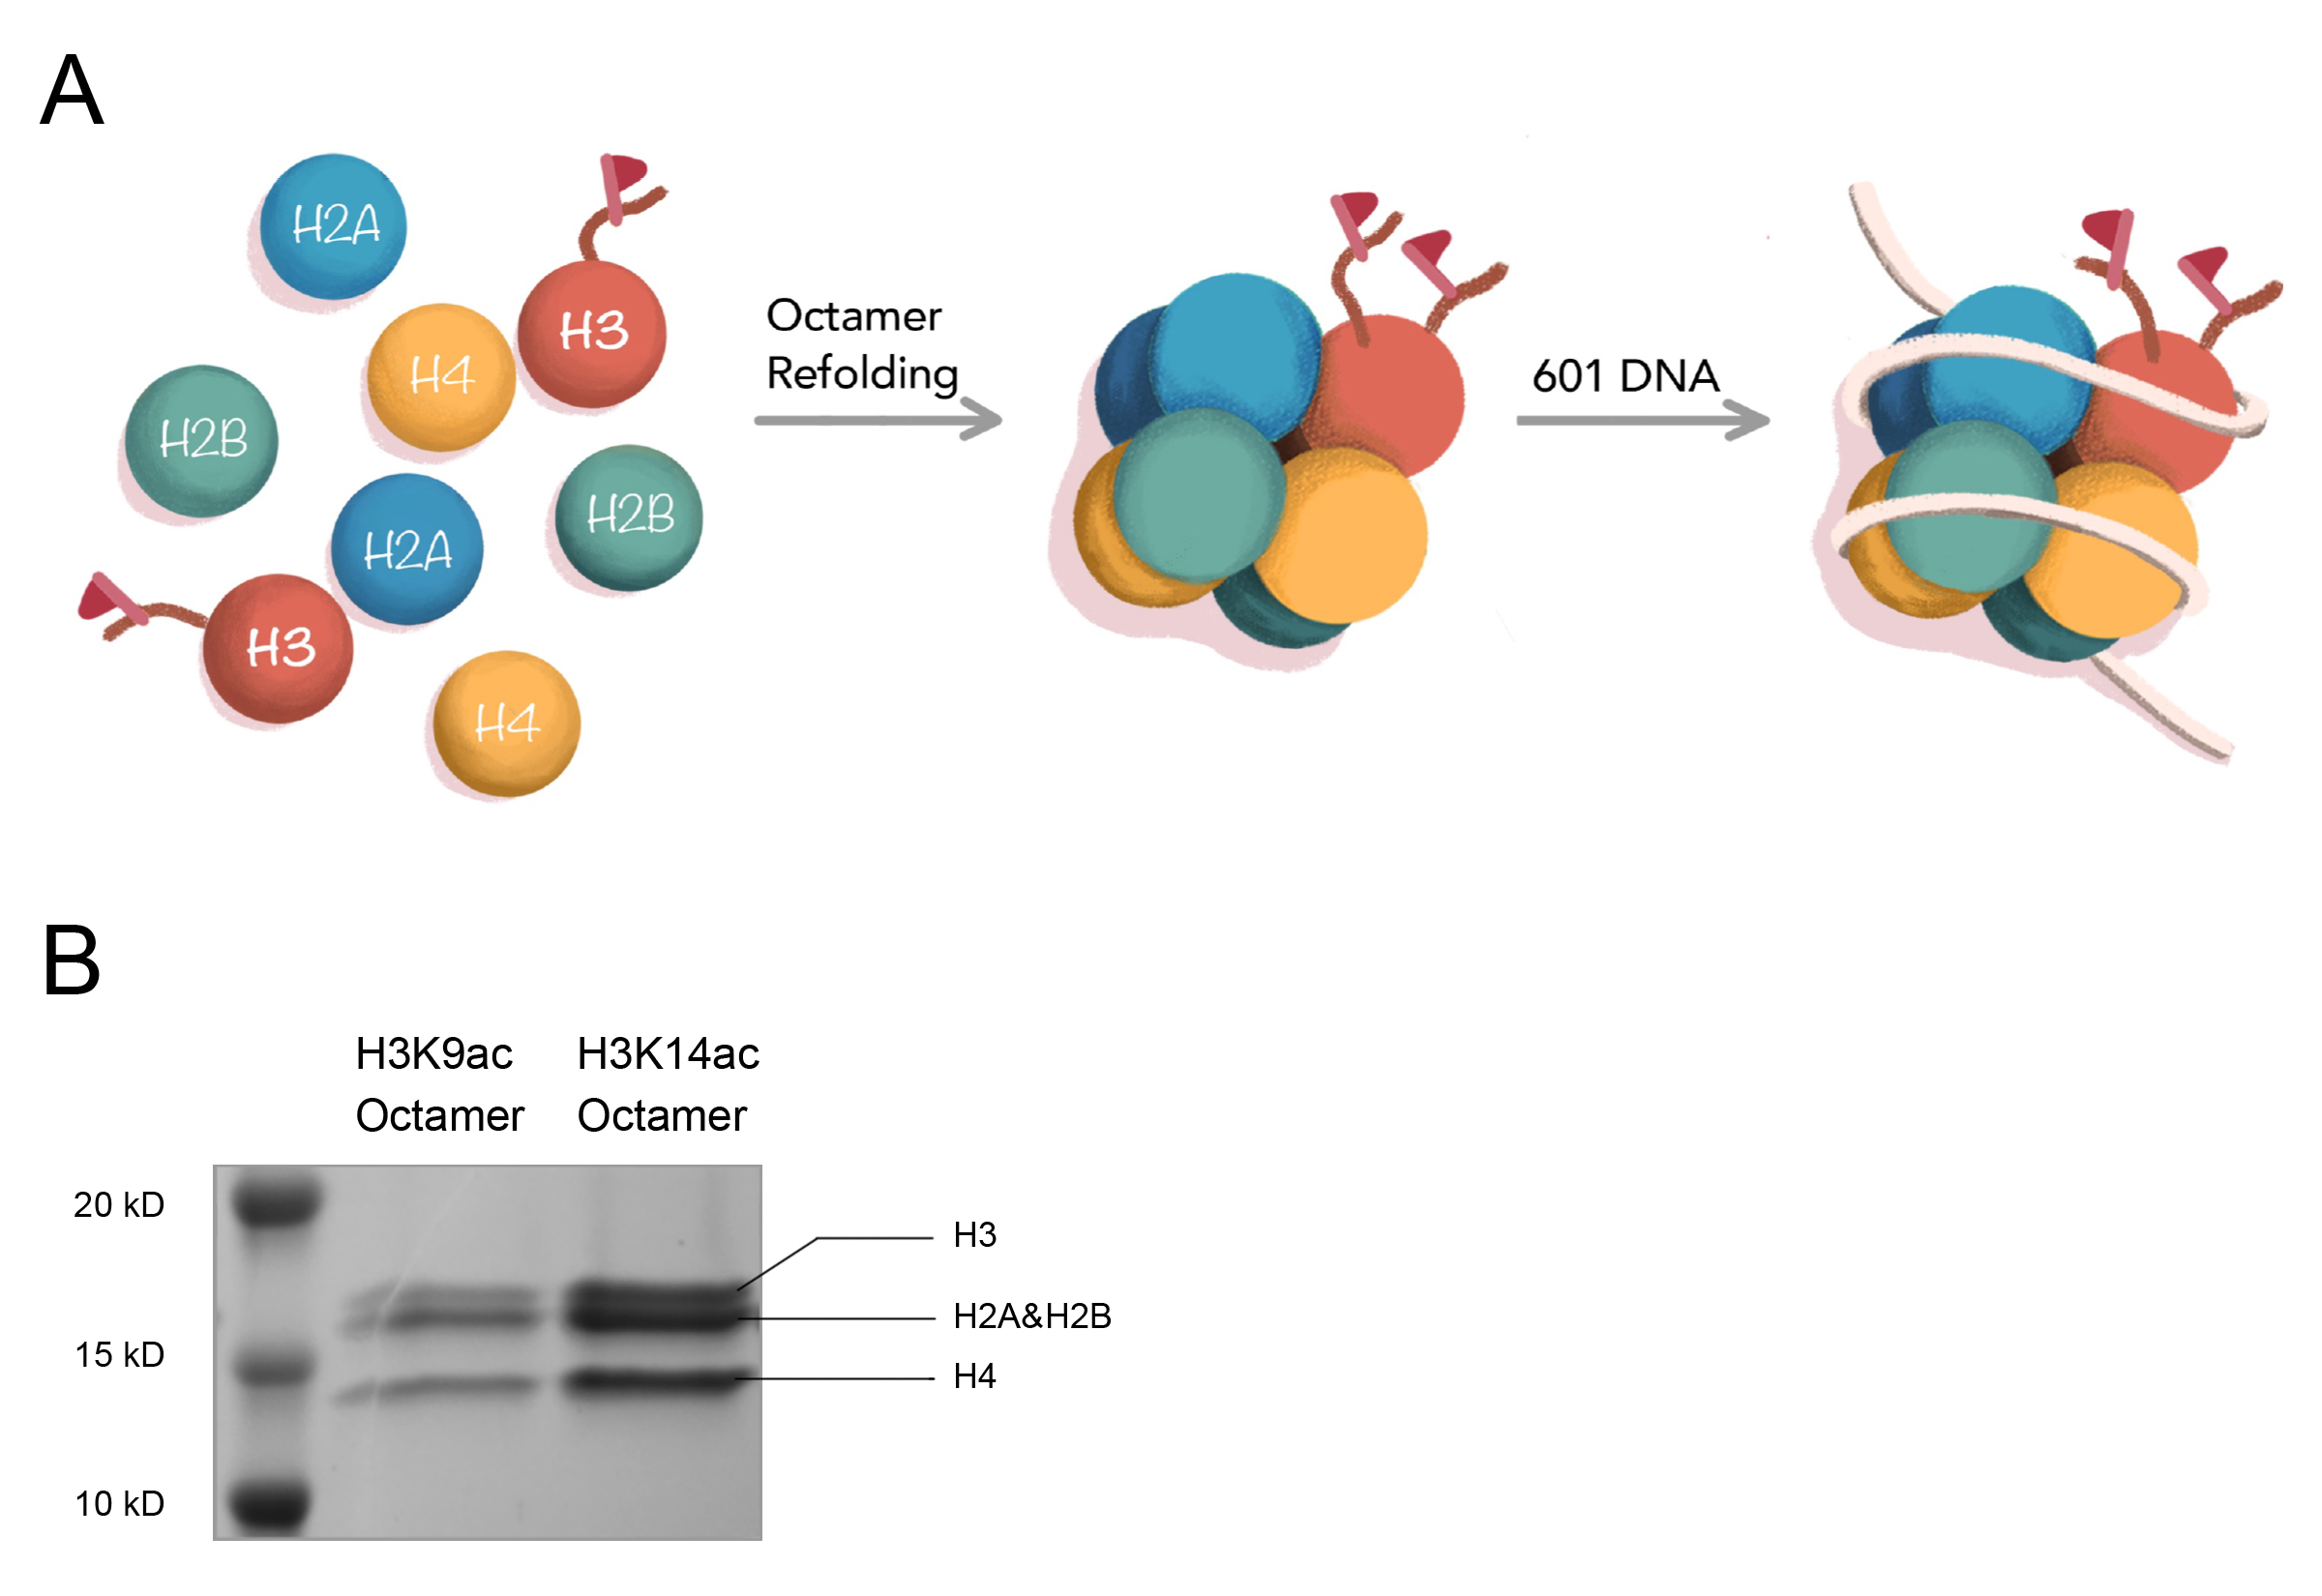

Supplement: supp [file elife-57663-supp-v1.zip › elife_poa_e57663_Figure_2_figure_supplement_3.jpg]

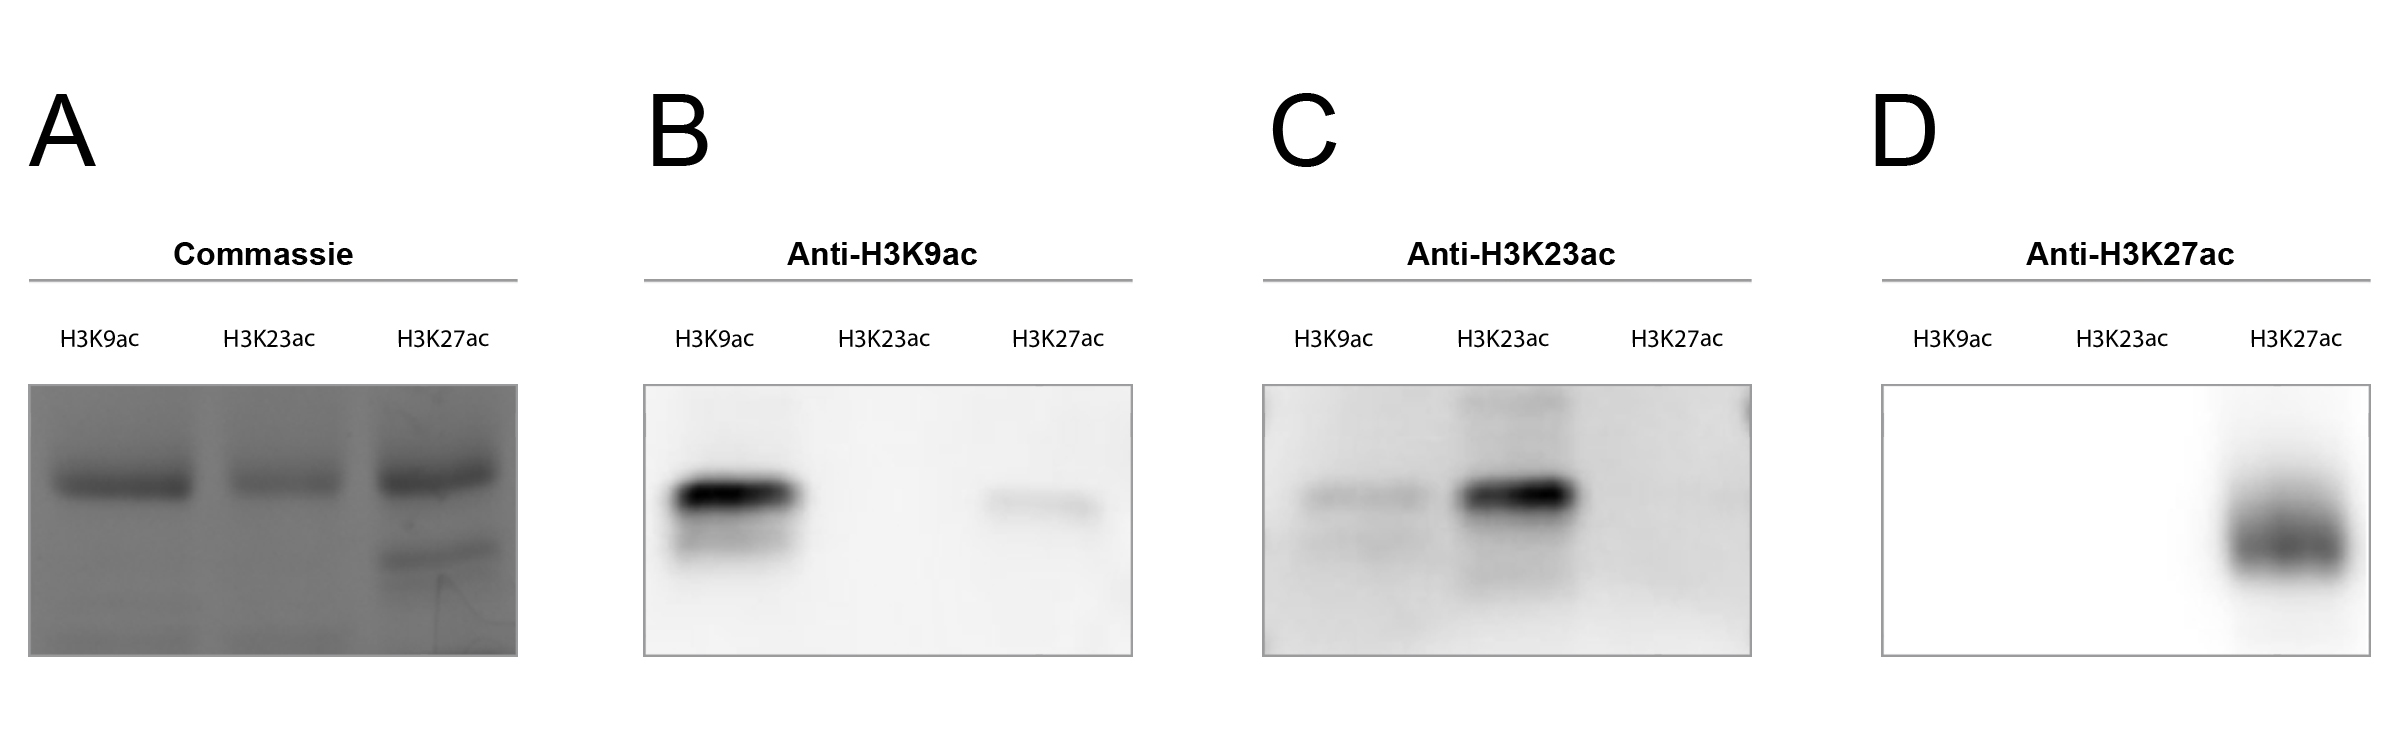

Supplement: supp [file elife-57663-supp-v1.zip › elife_poa_e57663_Figure_3_figure_supplement_1.jpg]

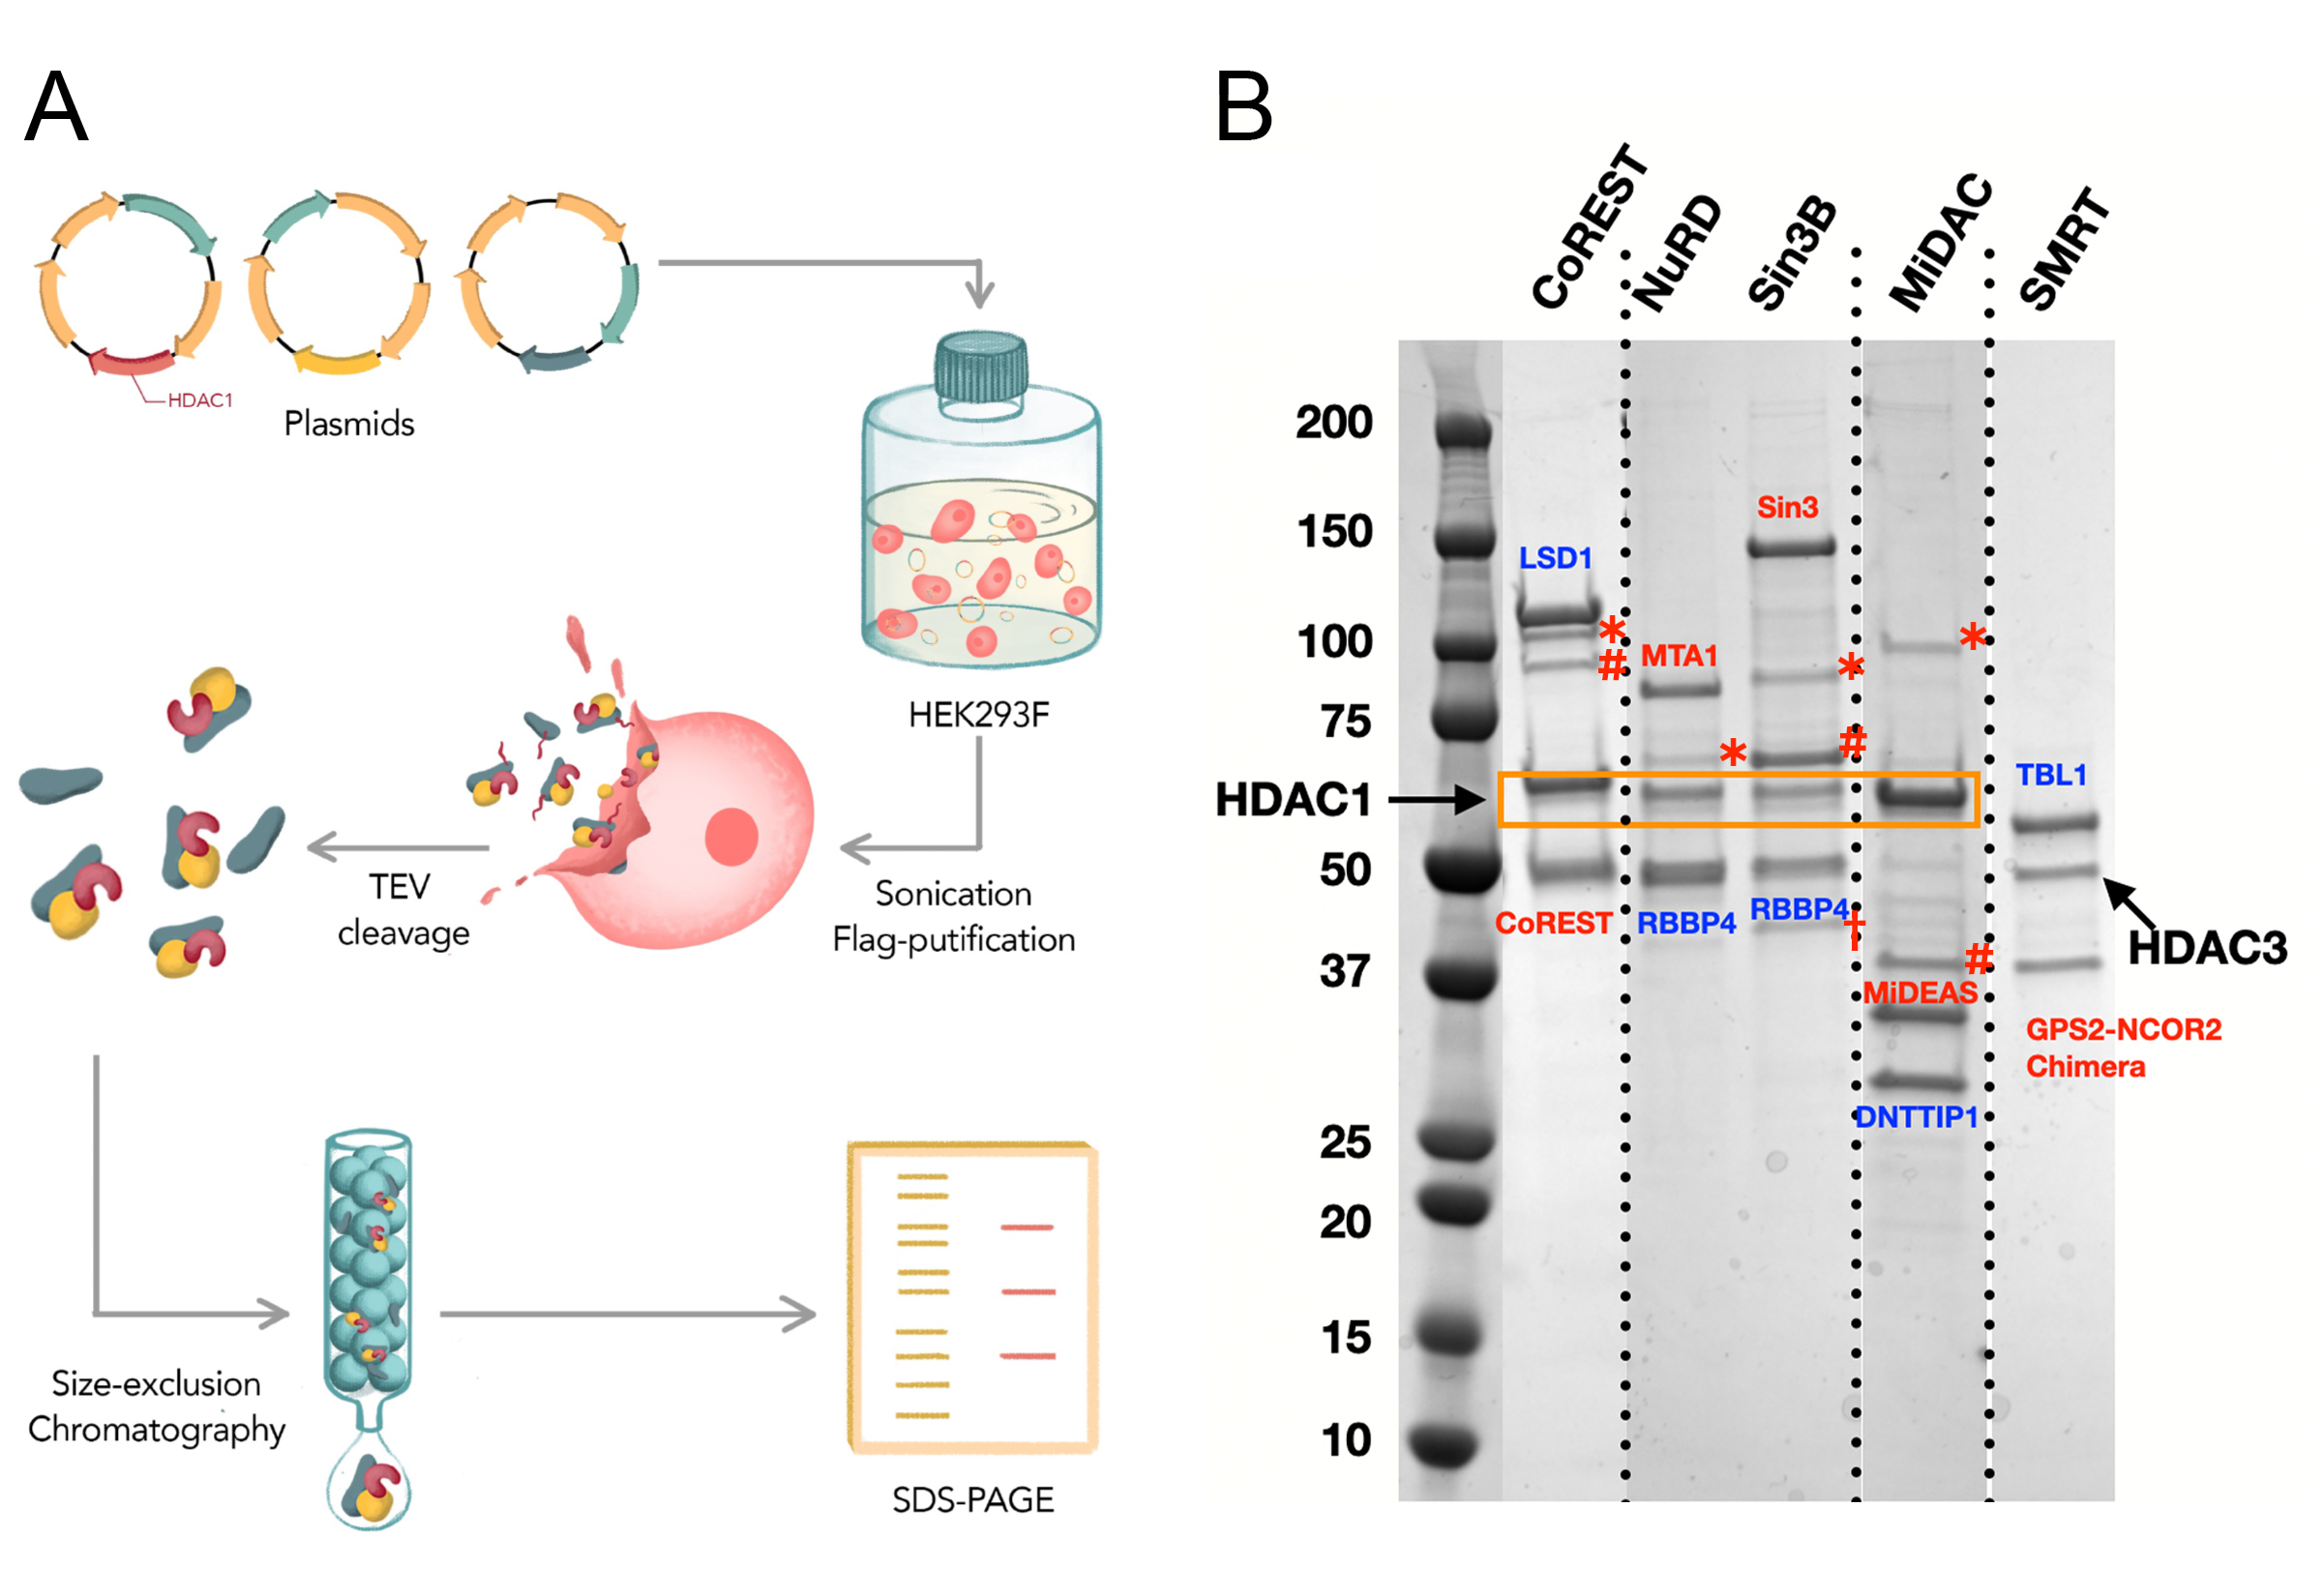

Supplement: supp [file elife-57663-supp-v1.zip › elife_poa_e57663_Figure_3_figure_supplement_2.jpg]

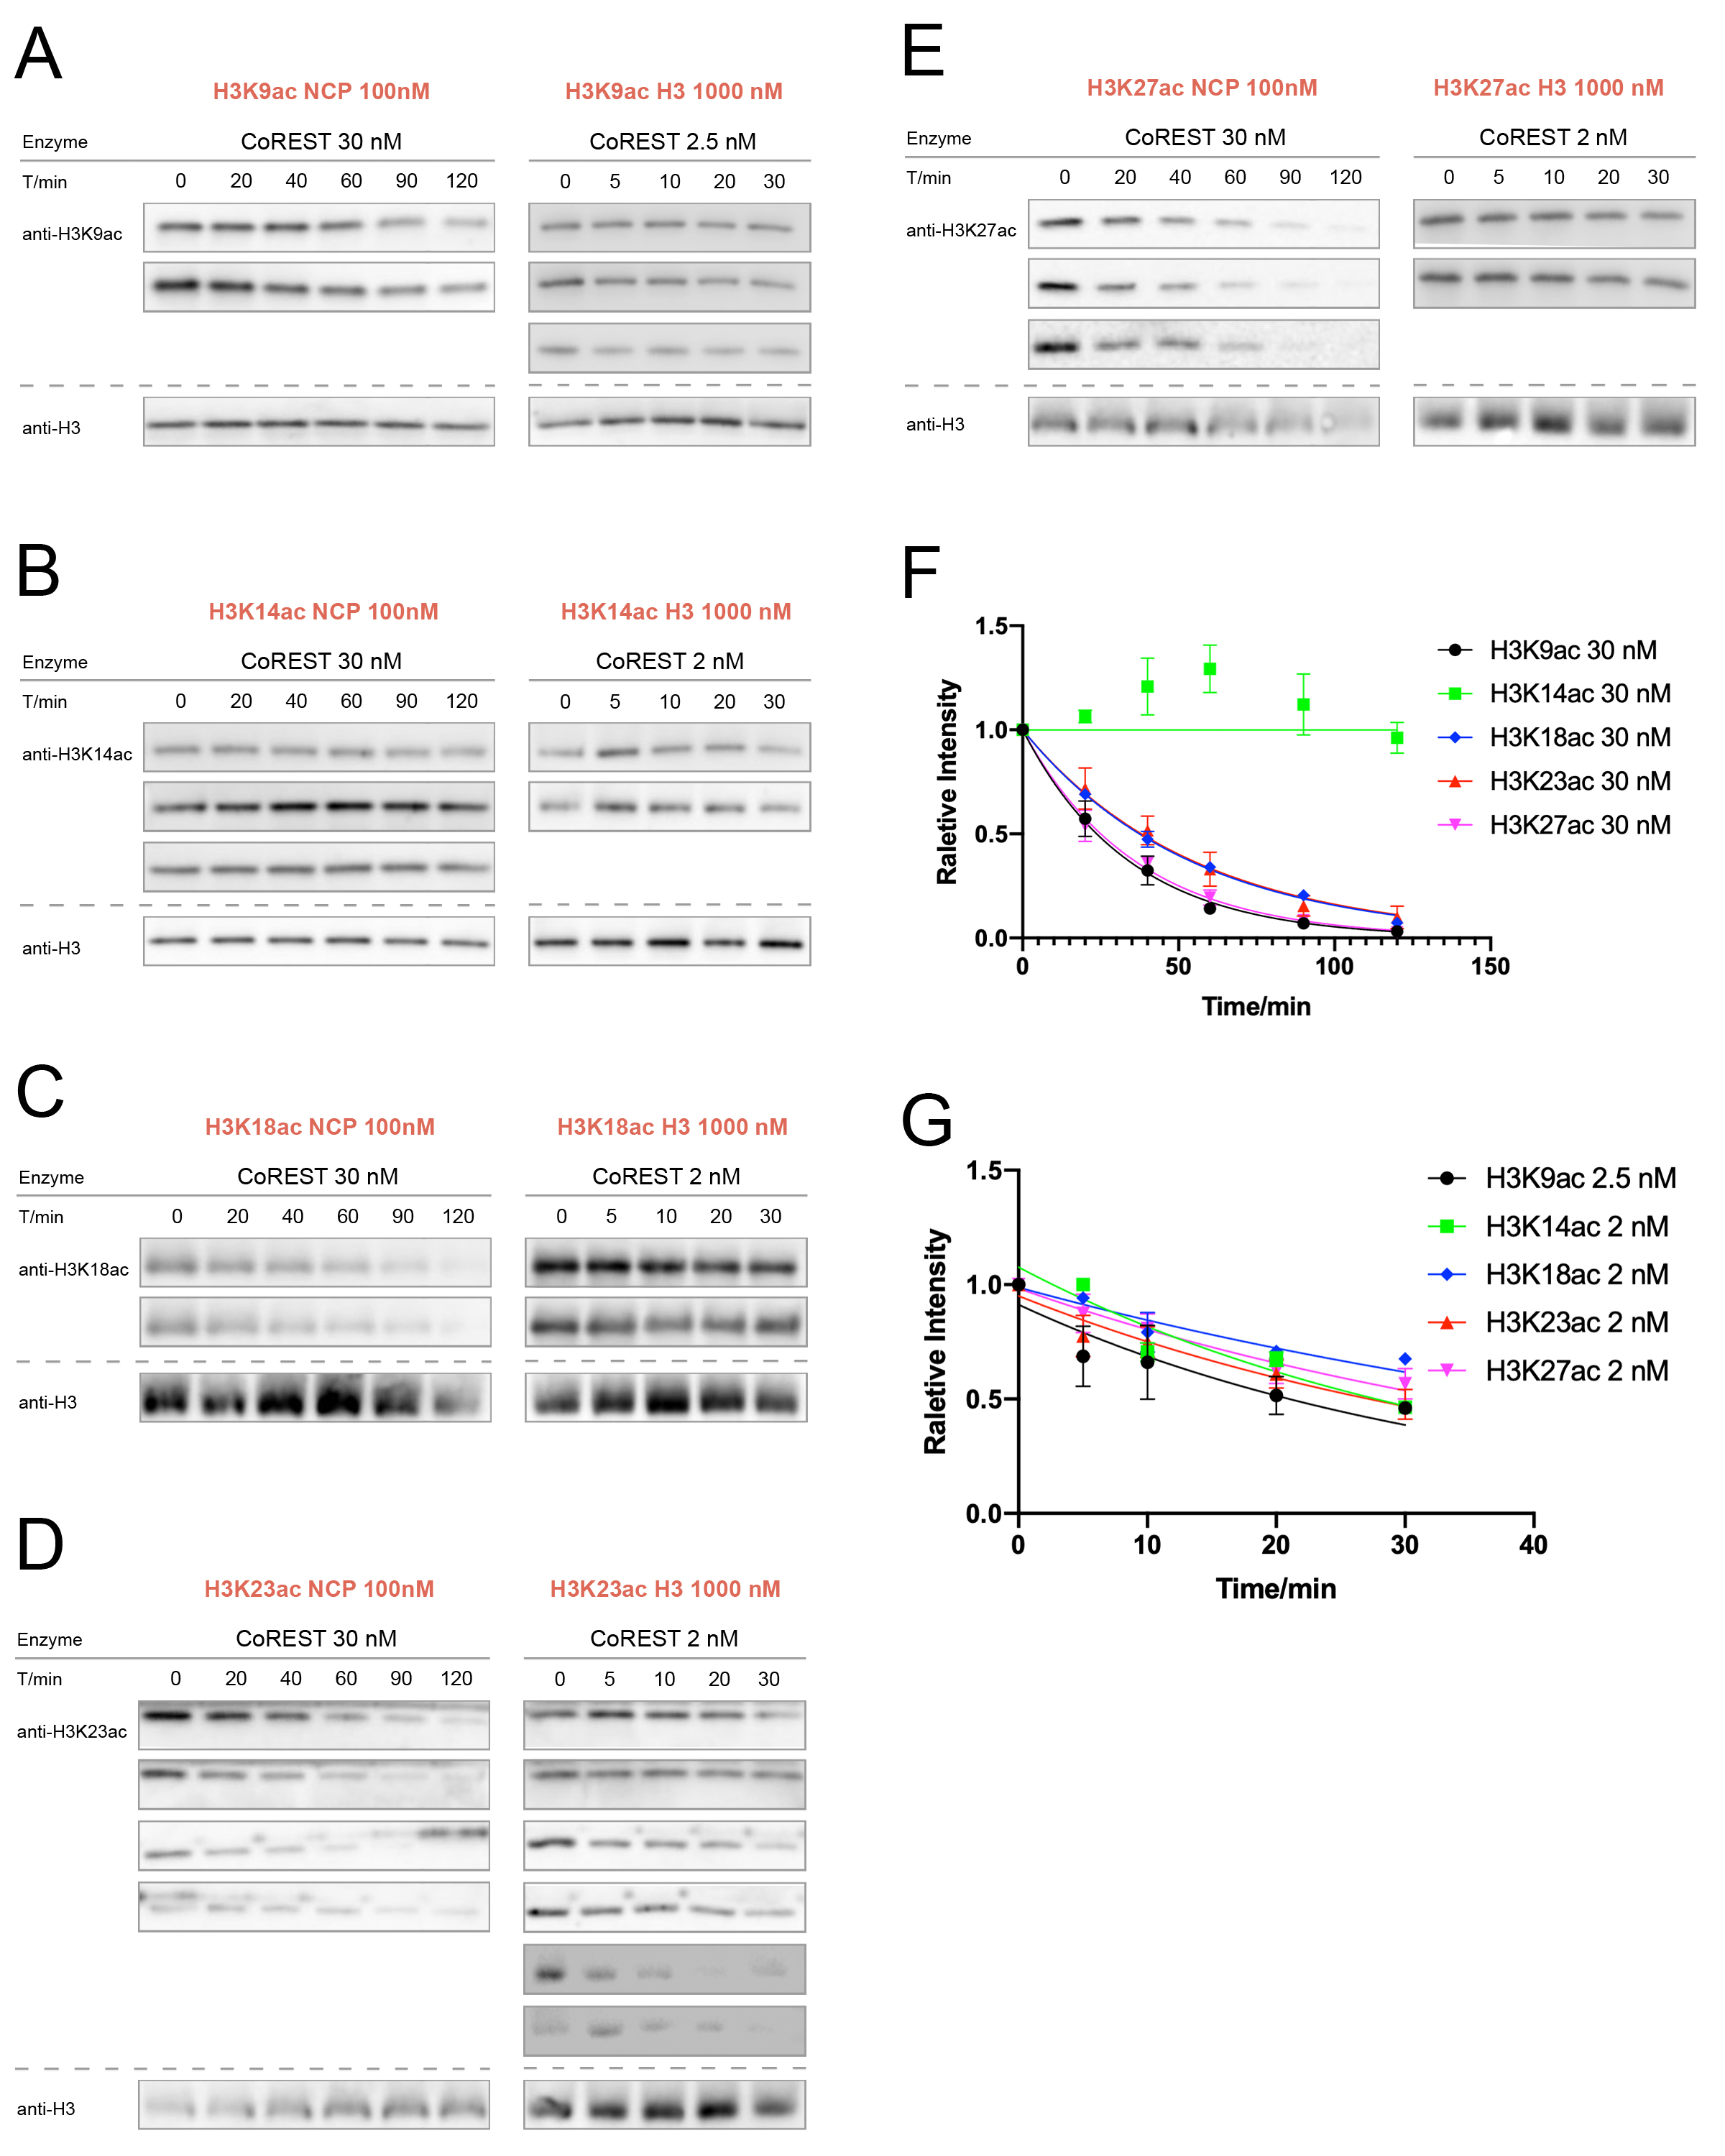

Supplement: supp [file elife-57663-supp-v1.zip › elife_poa_e57663_Figure_4_figure_supplement_1.jpg]

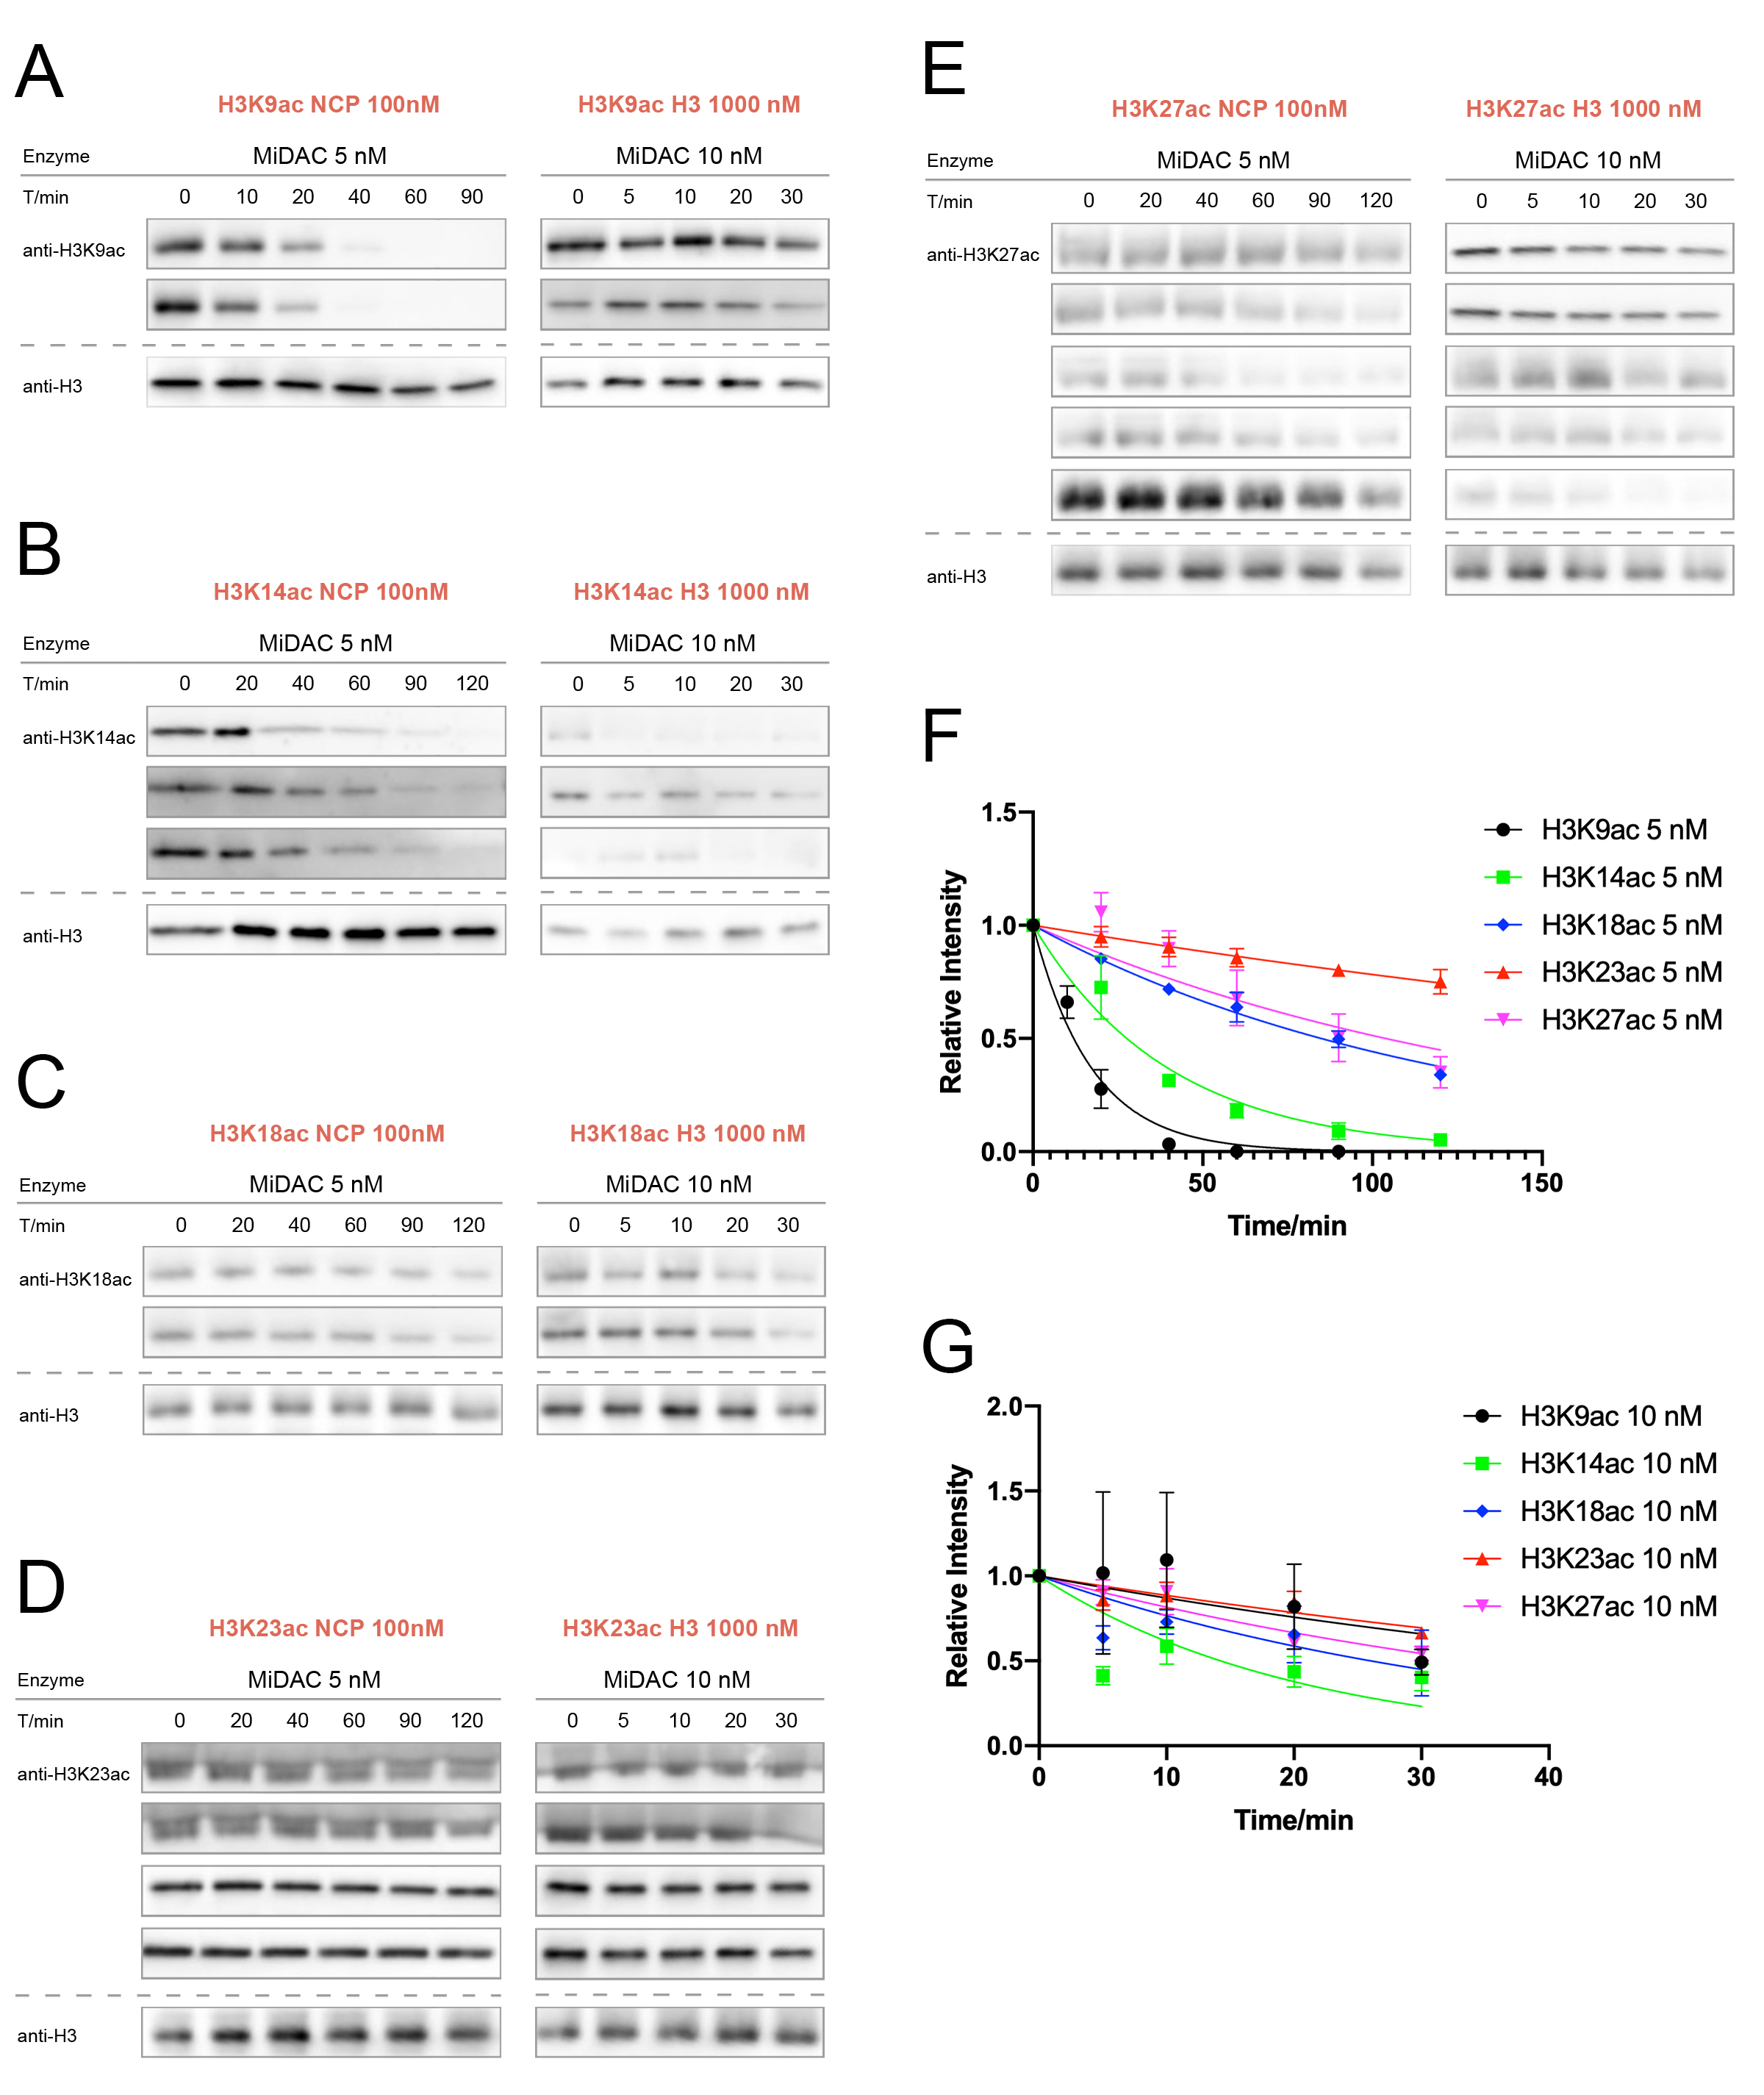

Supplement: supp [file elife-57663-supp-v1.zip › elife_poa_e57663_Figure_4_figure_supplement_2.jpg]

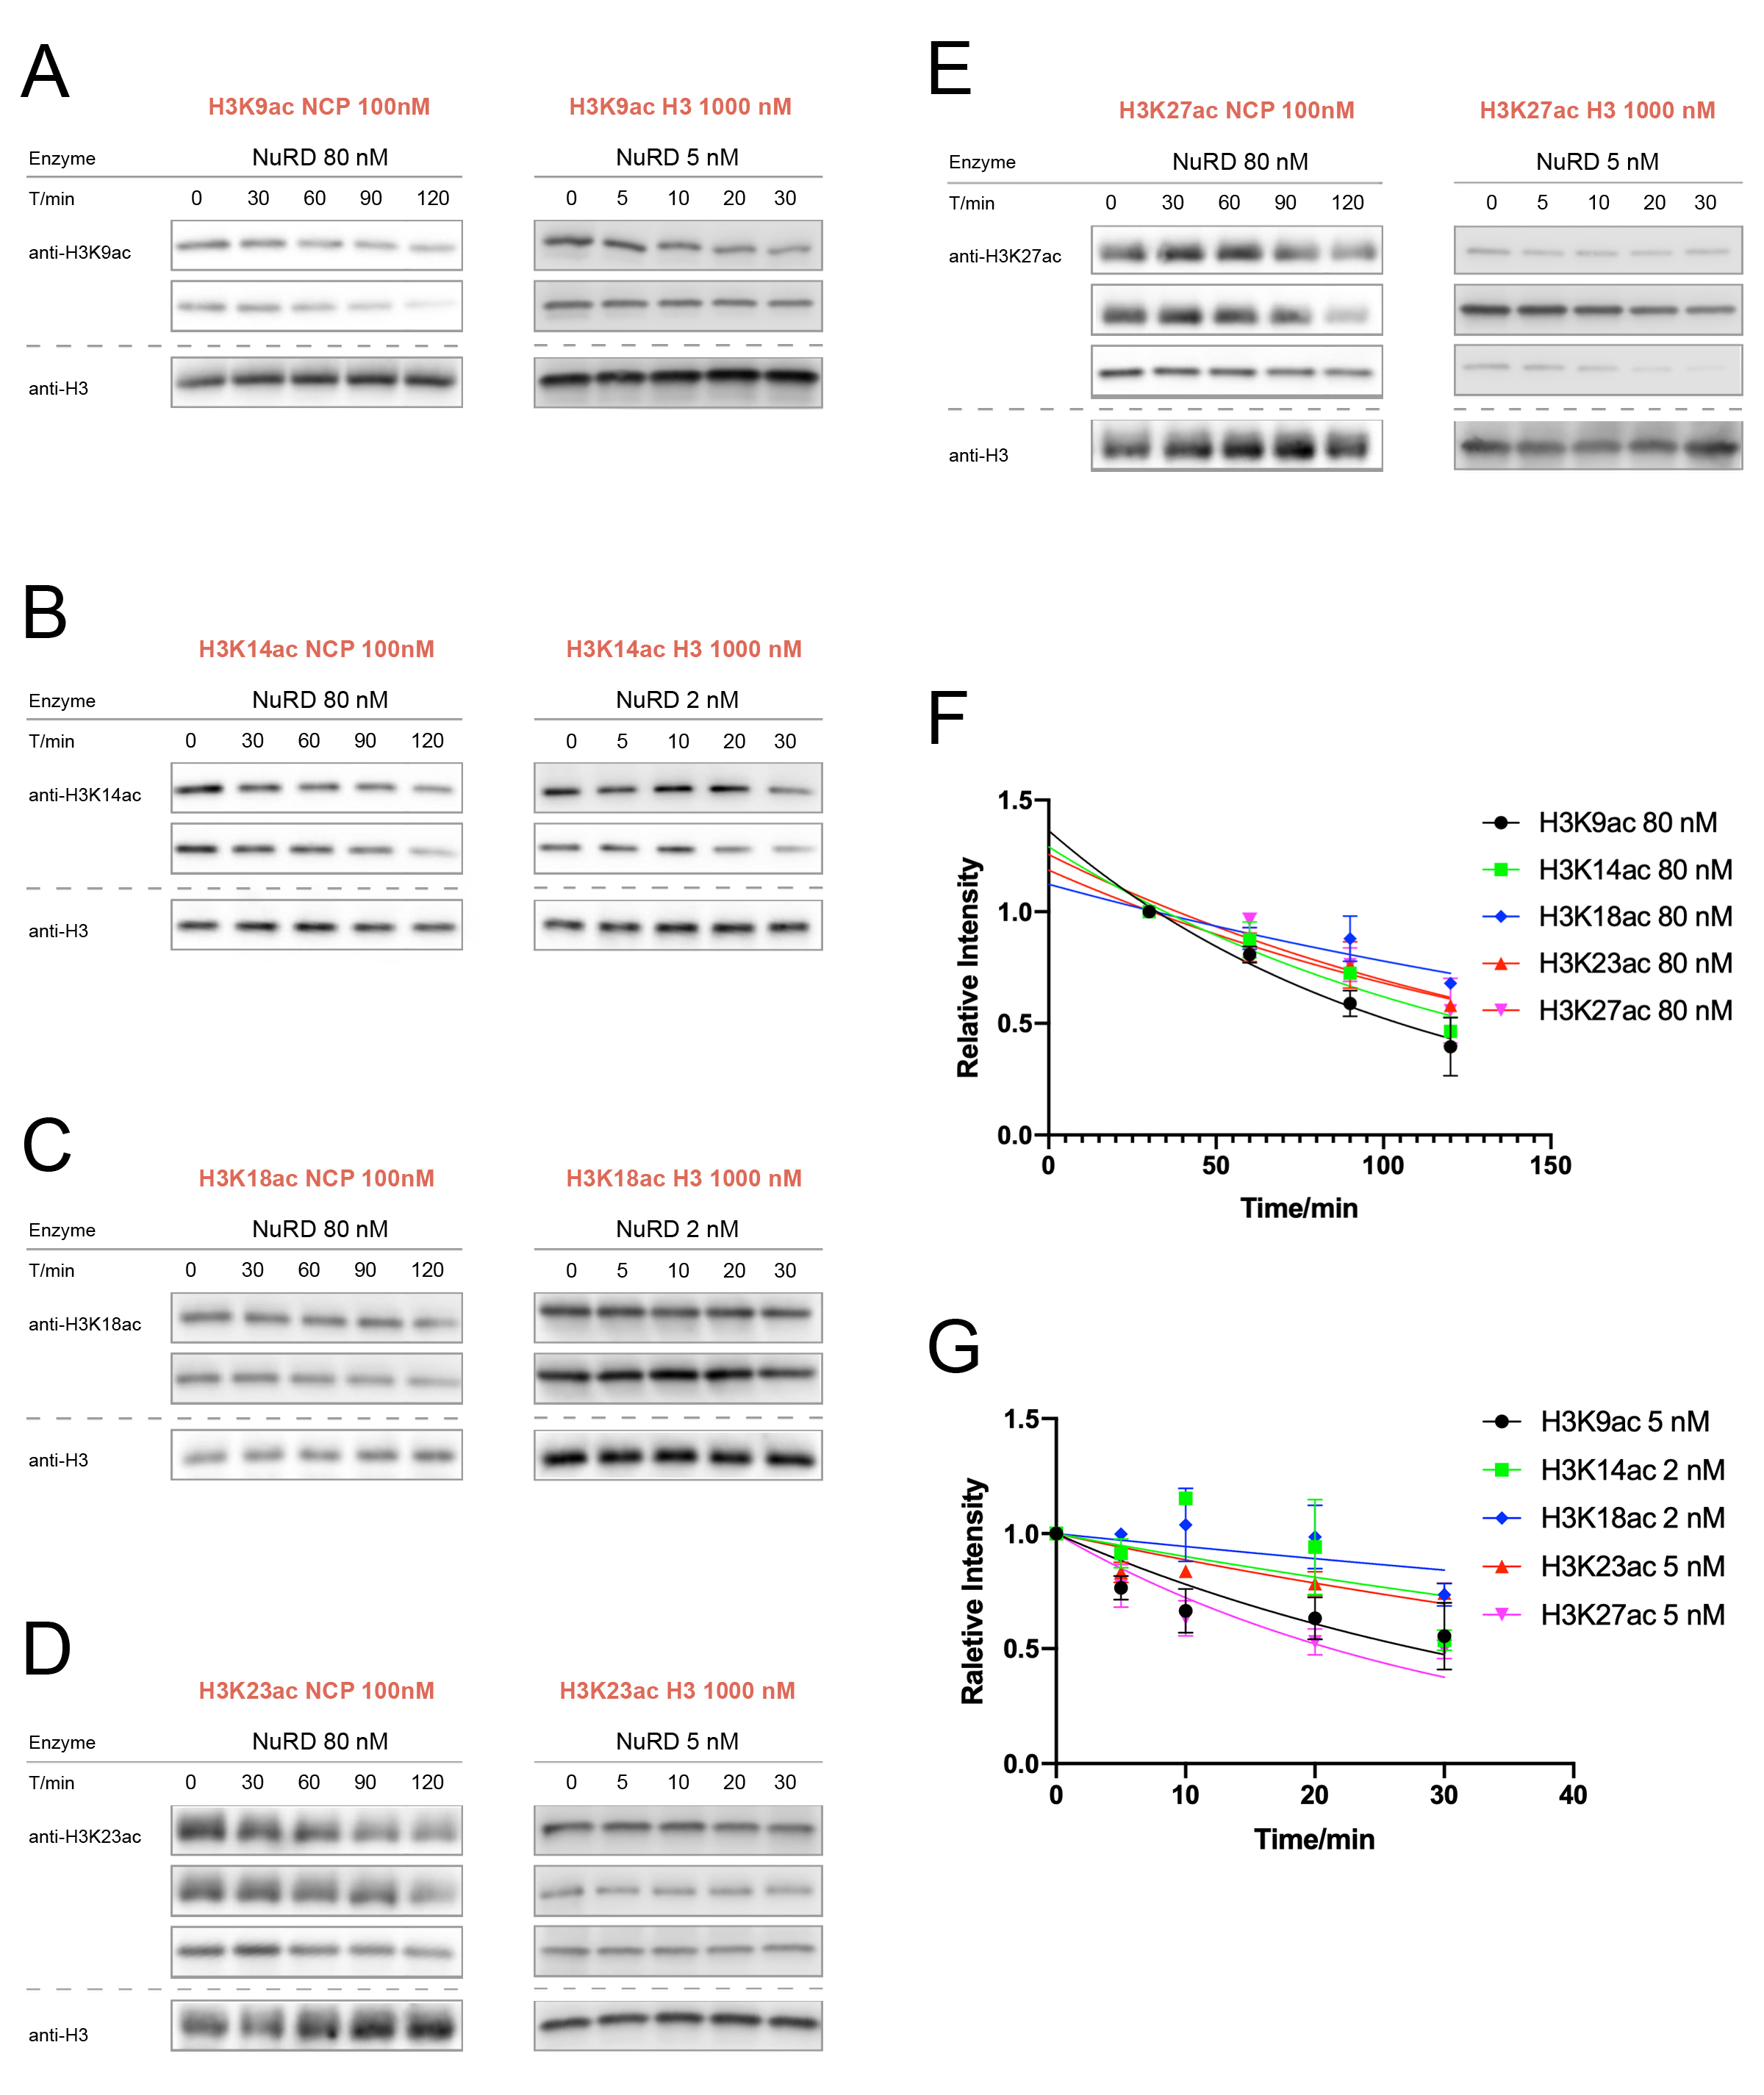

Supplement: supp [file elife-57663-supp-v1.zip › elife_poa_e57663_Figure_4_figure_supplement_3.jpg]

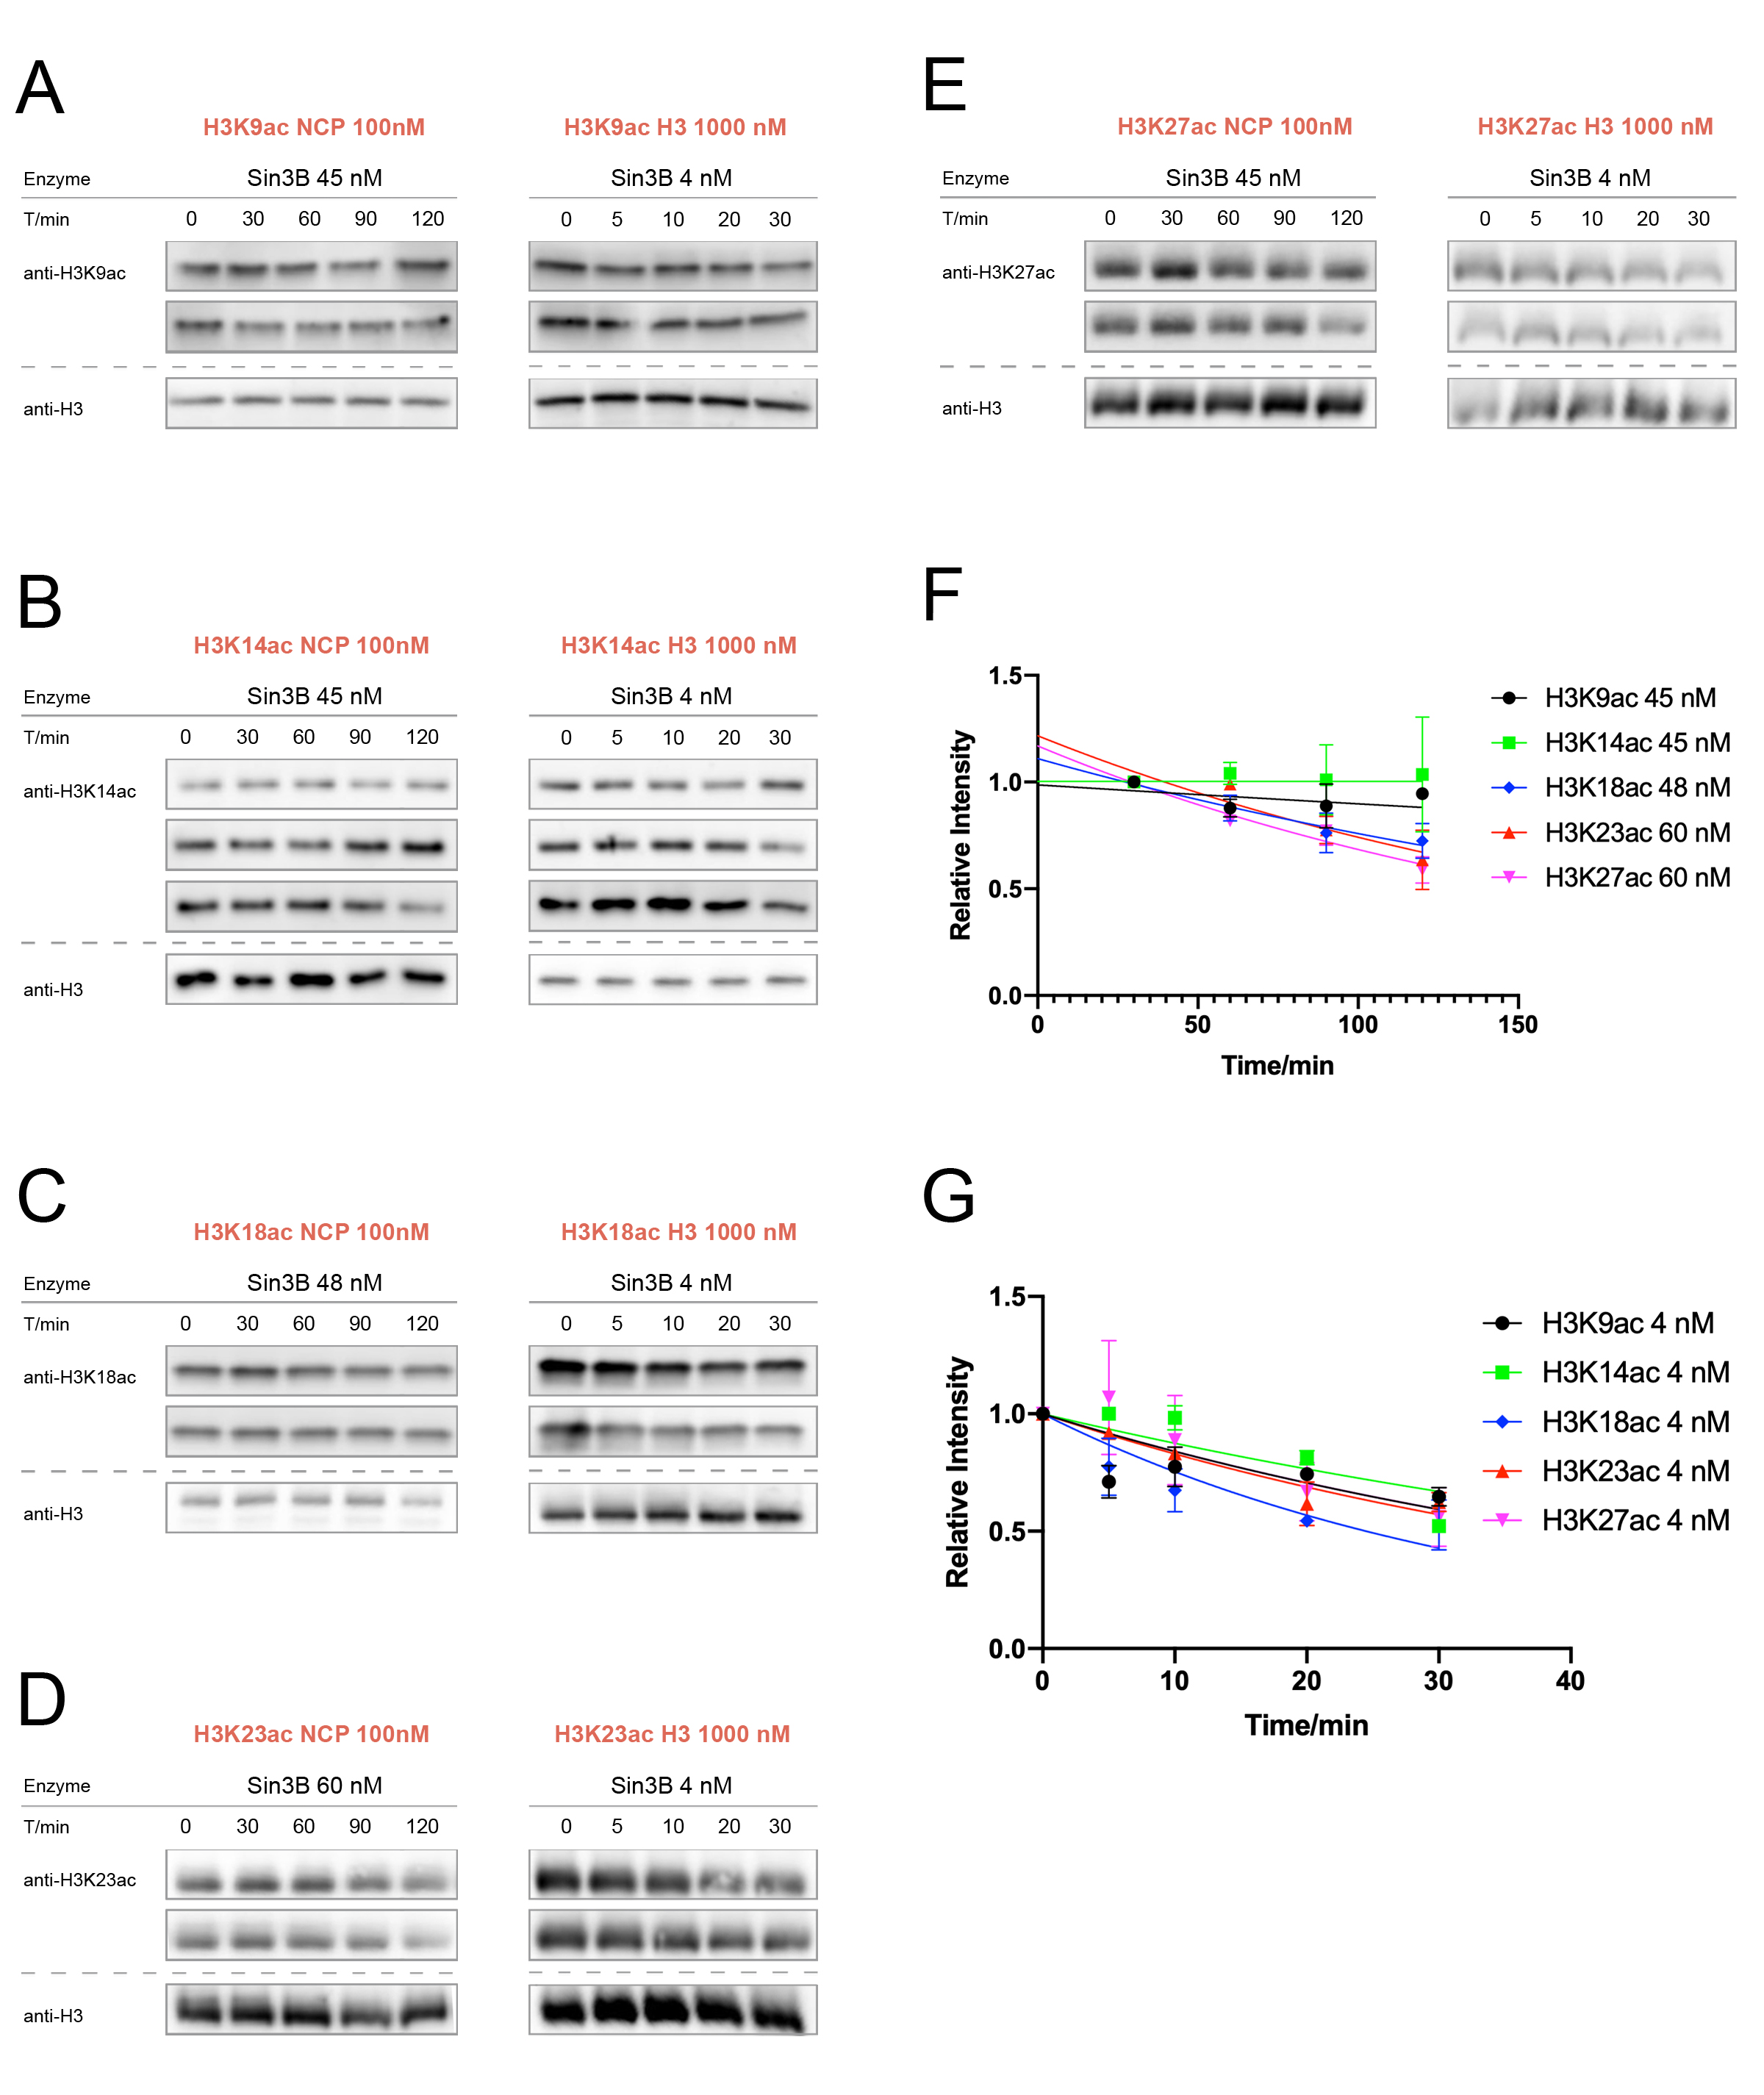

Supplement: supp [file elife-57663-supp-v1.zip › elife_poa_e57663_Figure_4_figure_supplement_4.jpg]

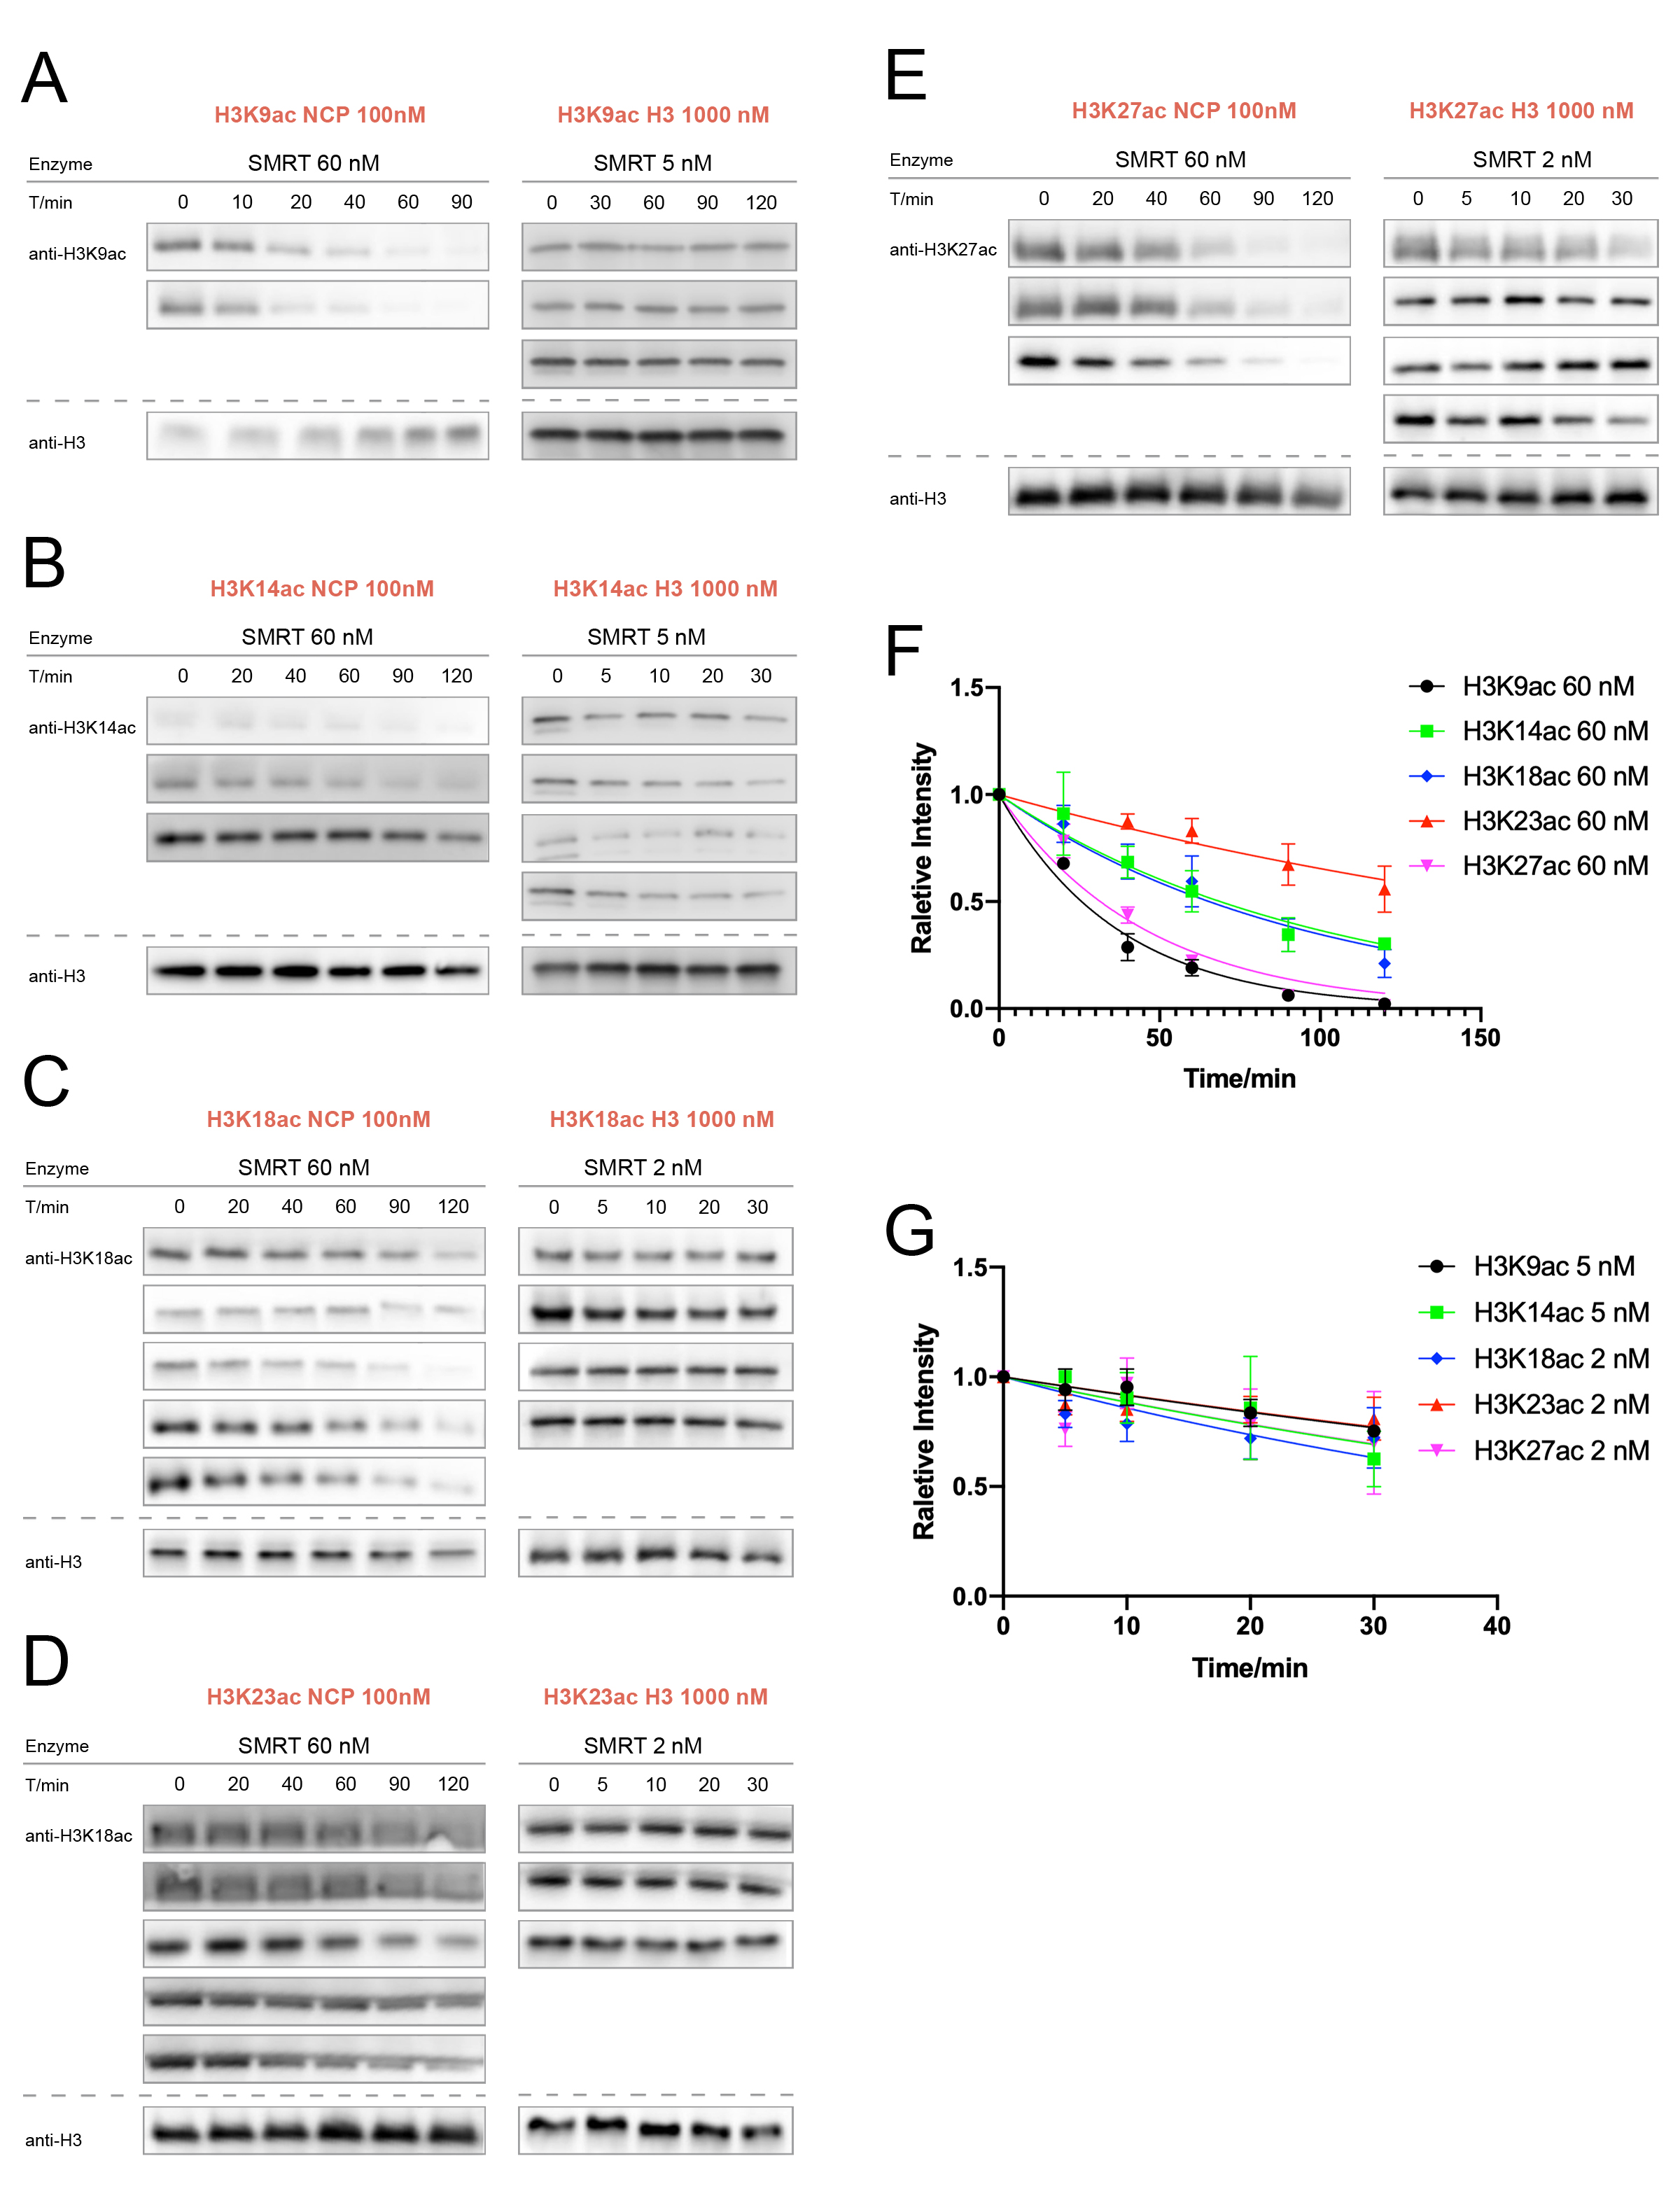

Supplement: supp [file elife-57663-supp-v1.zip › elife_poa_e57663_Figure_4_figure_supplement_5.jpg]

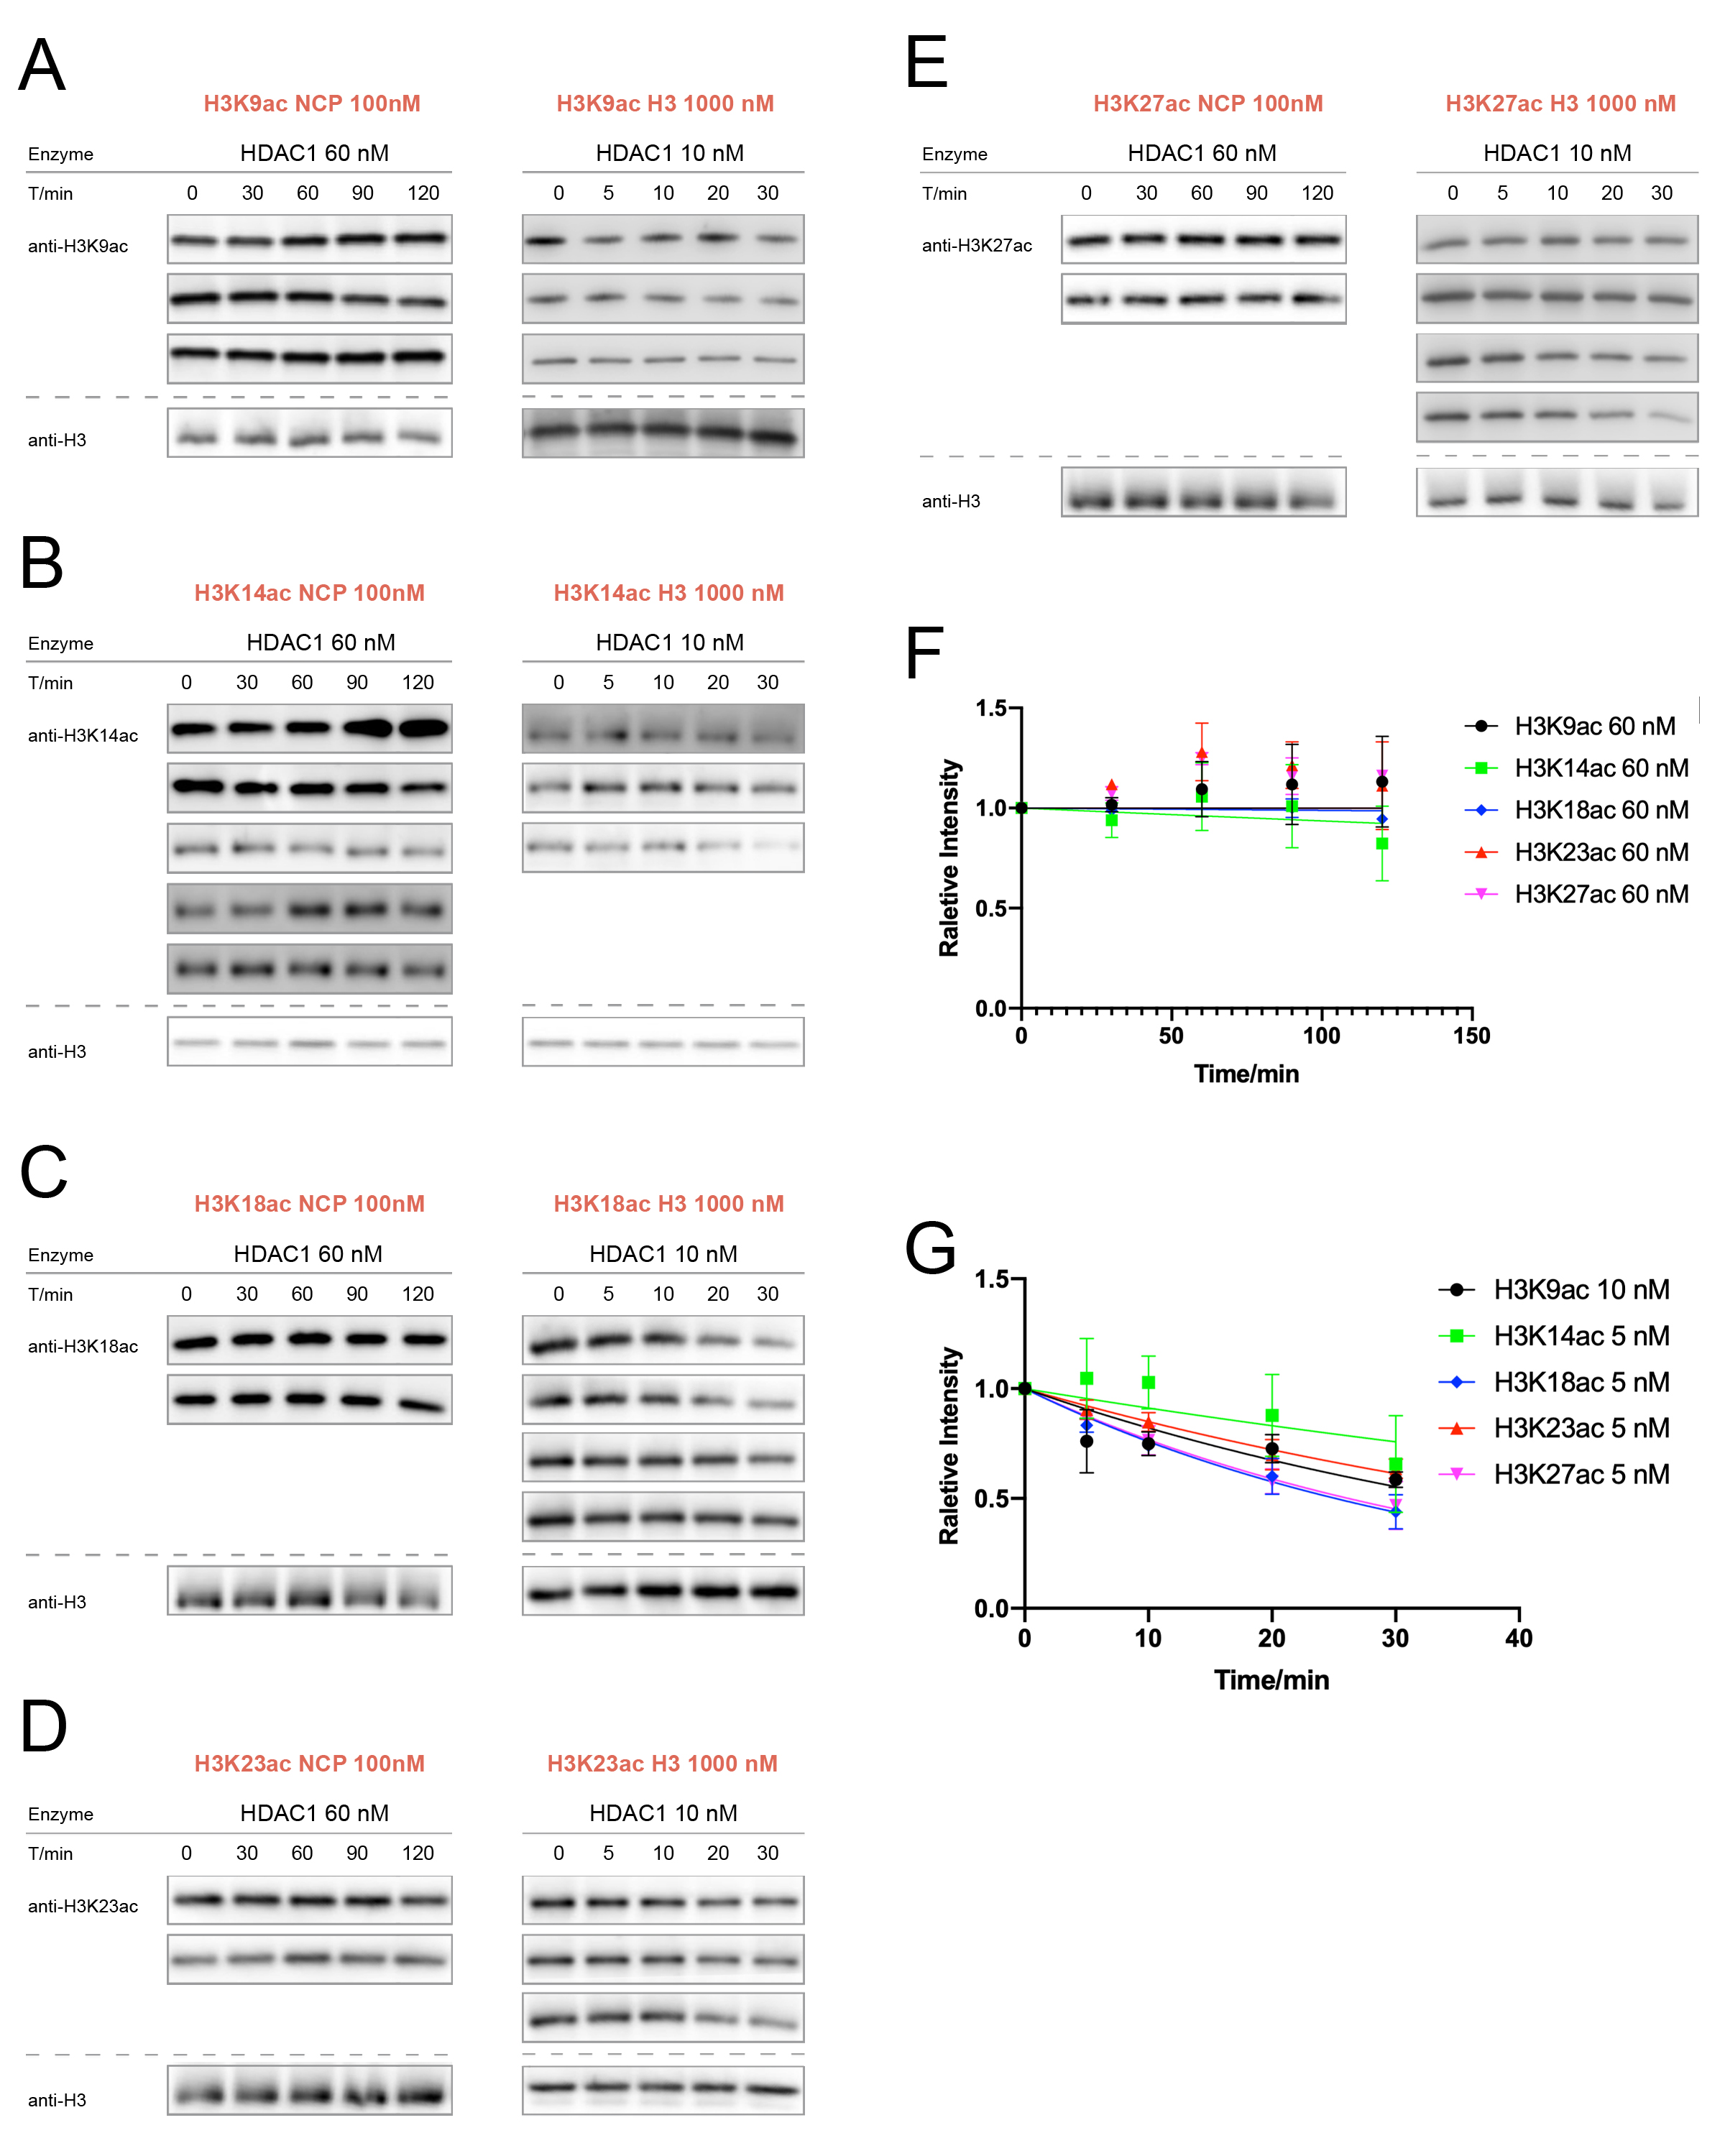

Supplement: supp [file elife-57663-supp-v1.zip › elife_poa_e57663_Figure_4_figure_supplement_6.jpg]

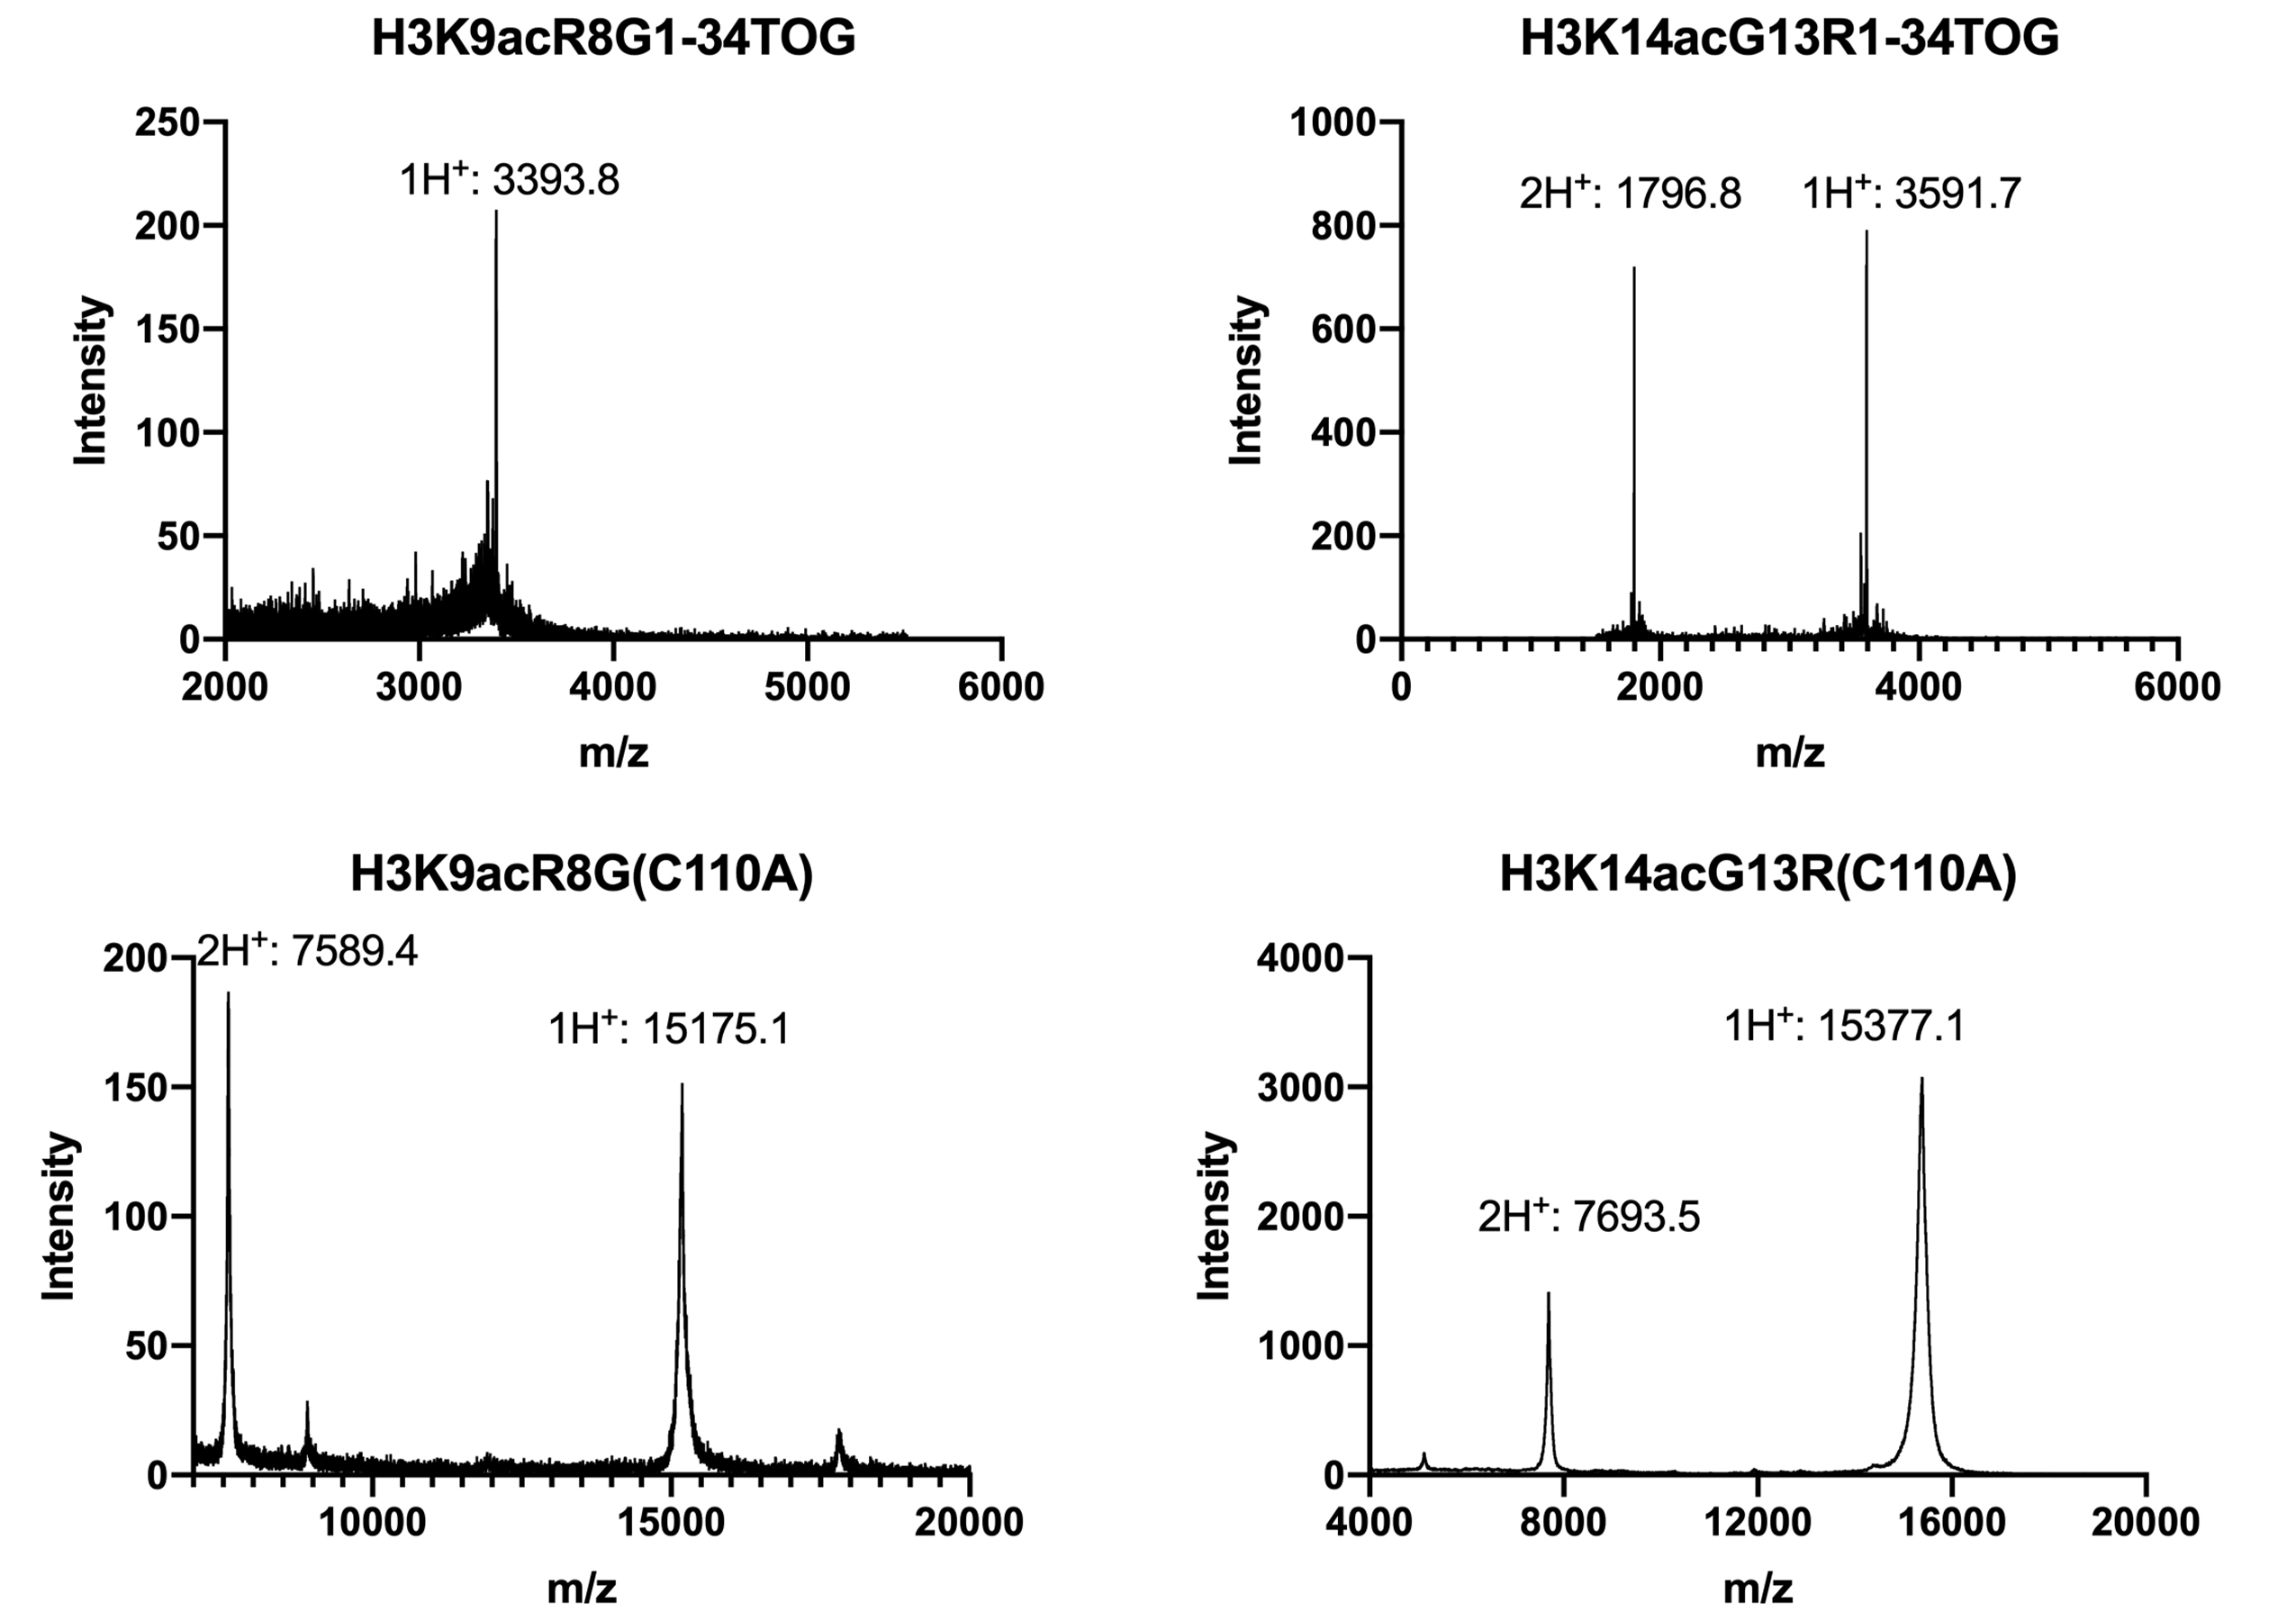

Supplement: supp [file elife-57663-supp-v1.zip › elife_poa_e57663_Figure_5_figure_supplement_1.jpg]

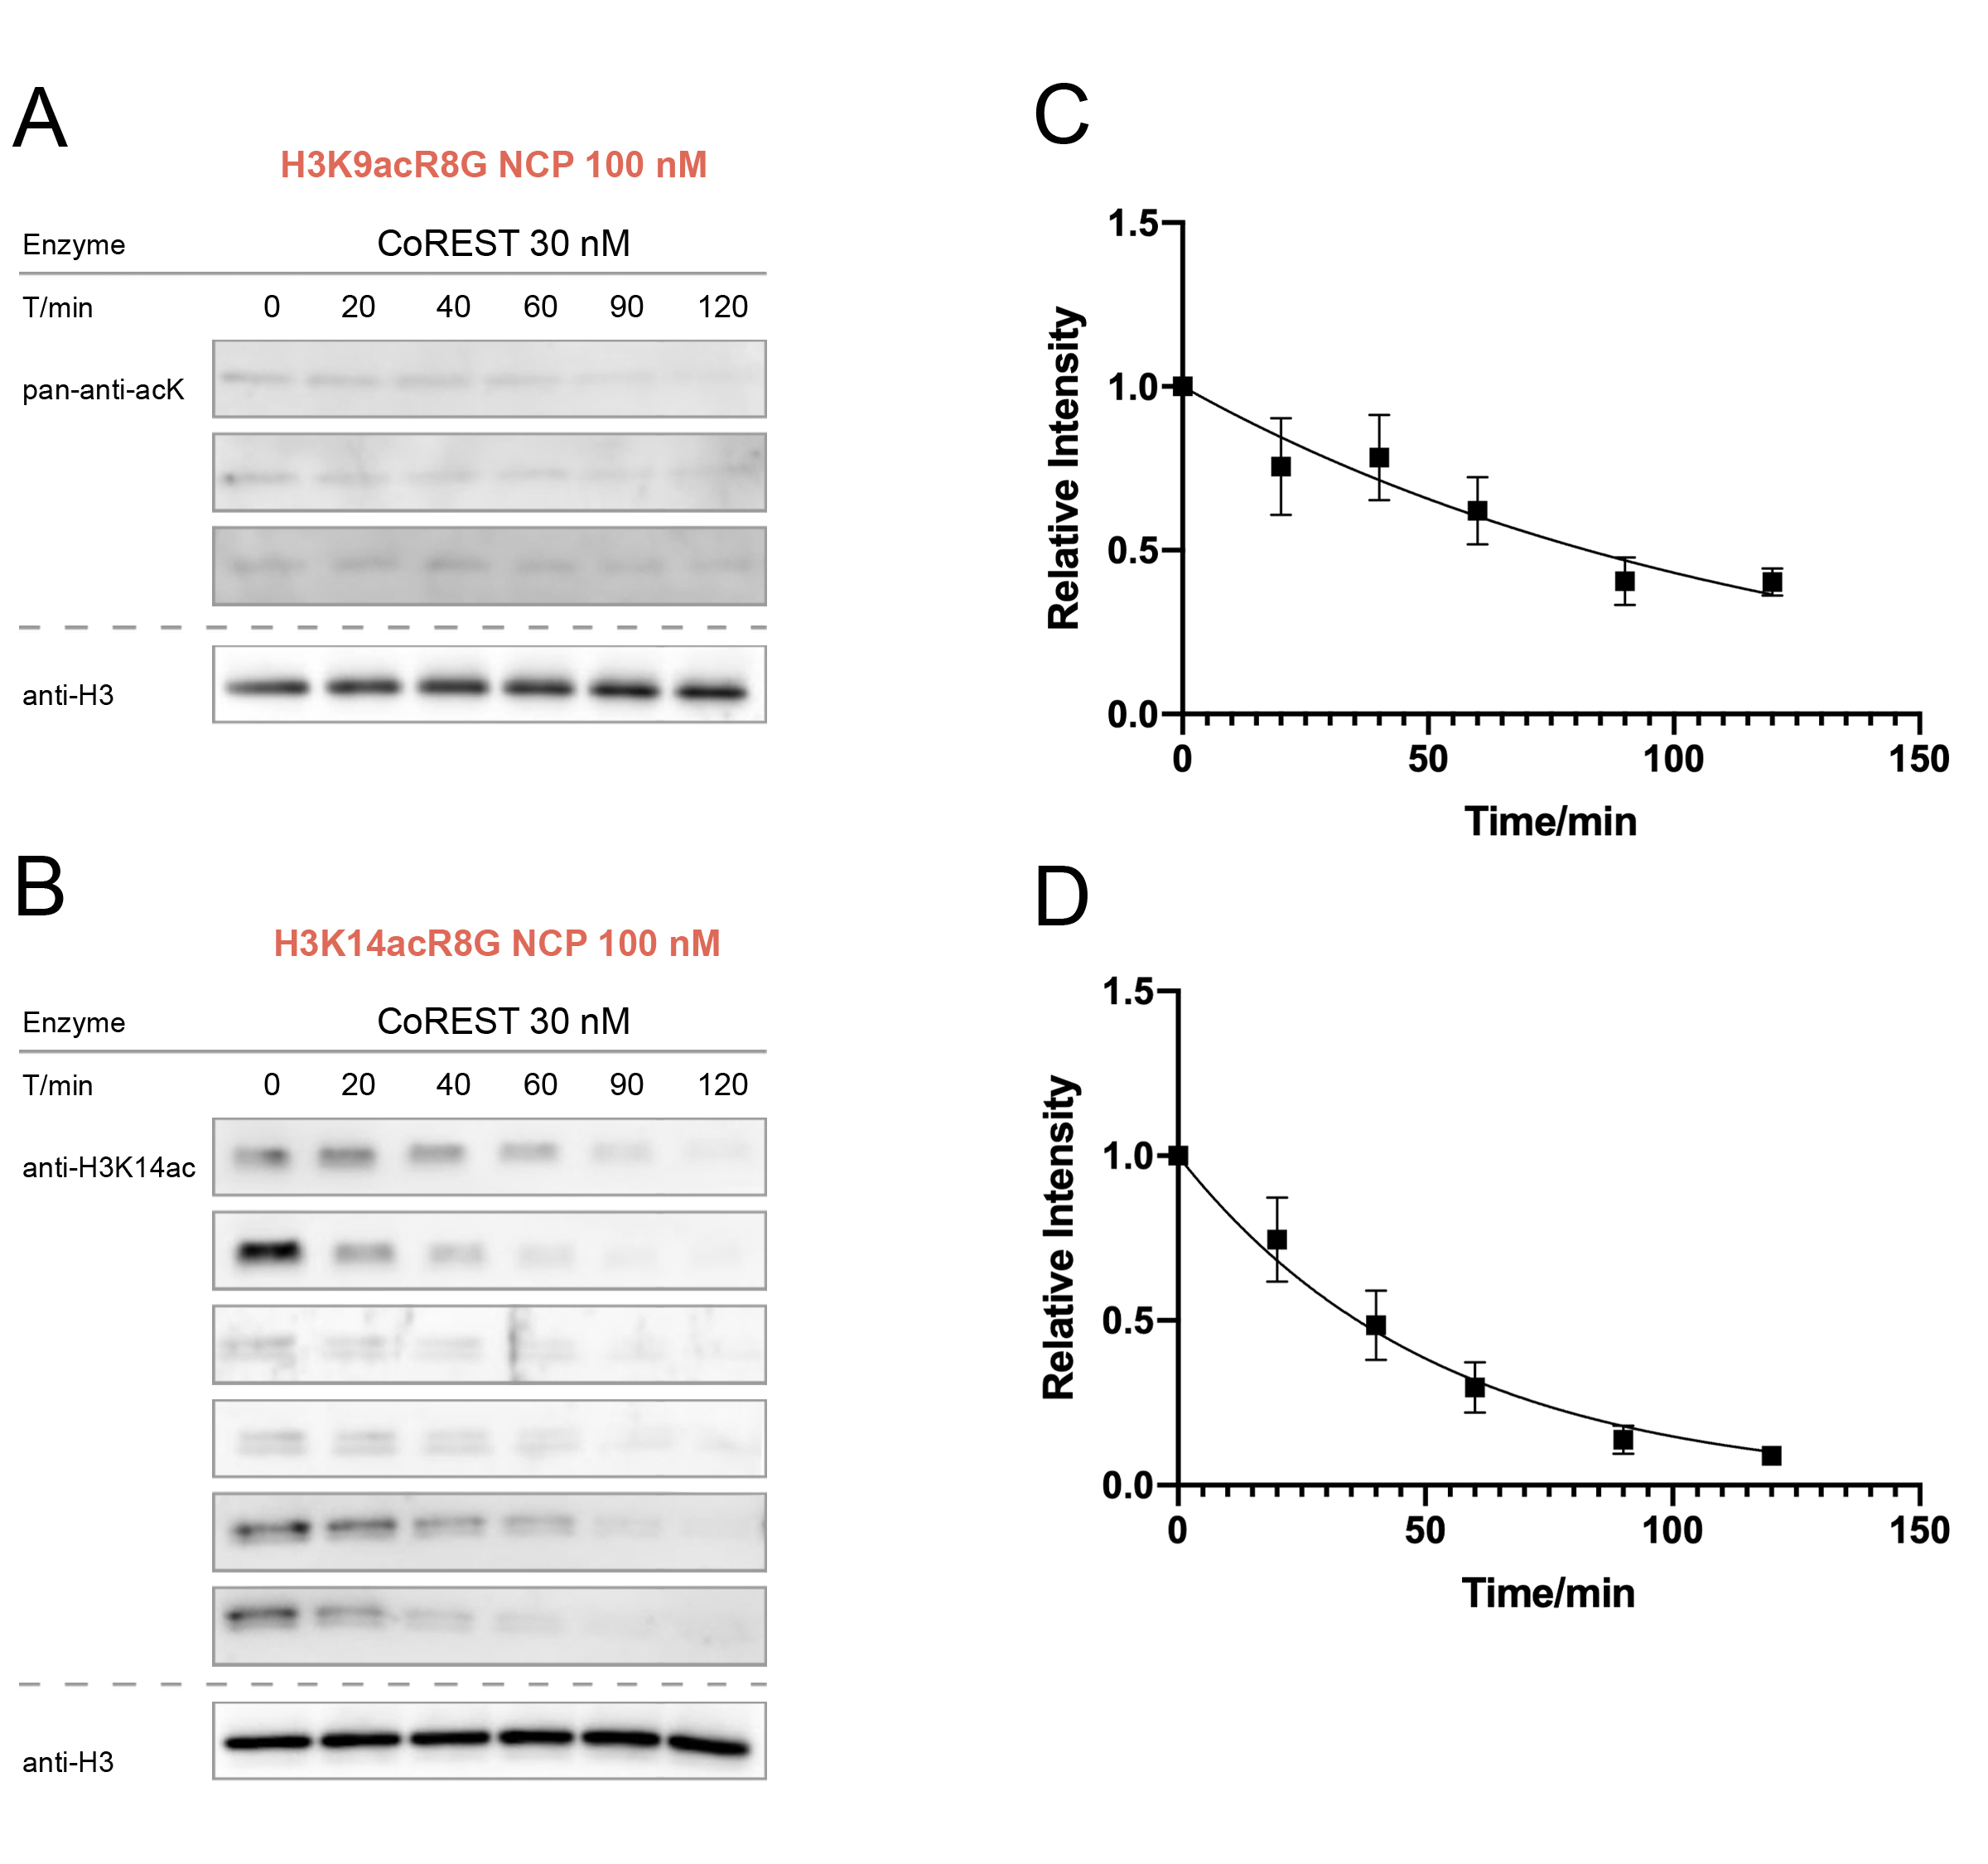

Supplement: supp [file elife-57663-supp-v1.zip › elife_poa_e57663_Figure_5_figure_supplement_2.jpg]

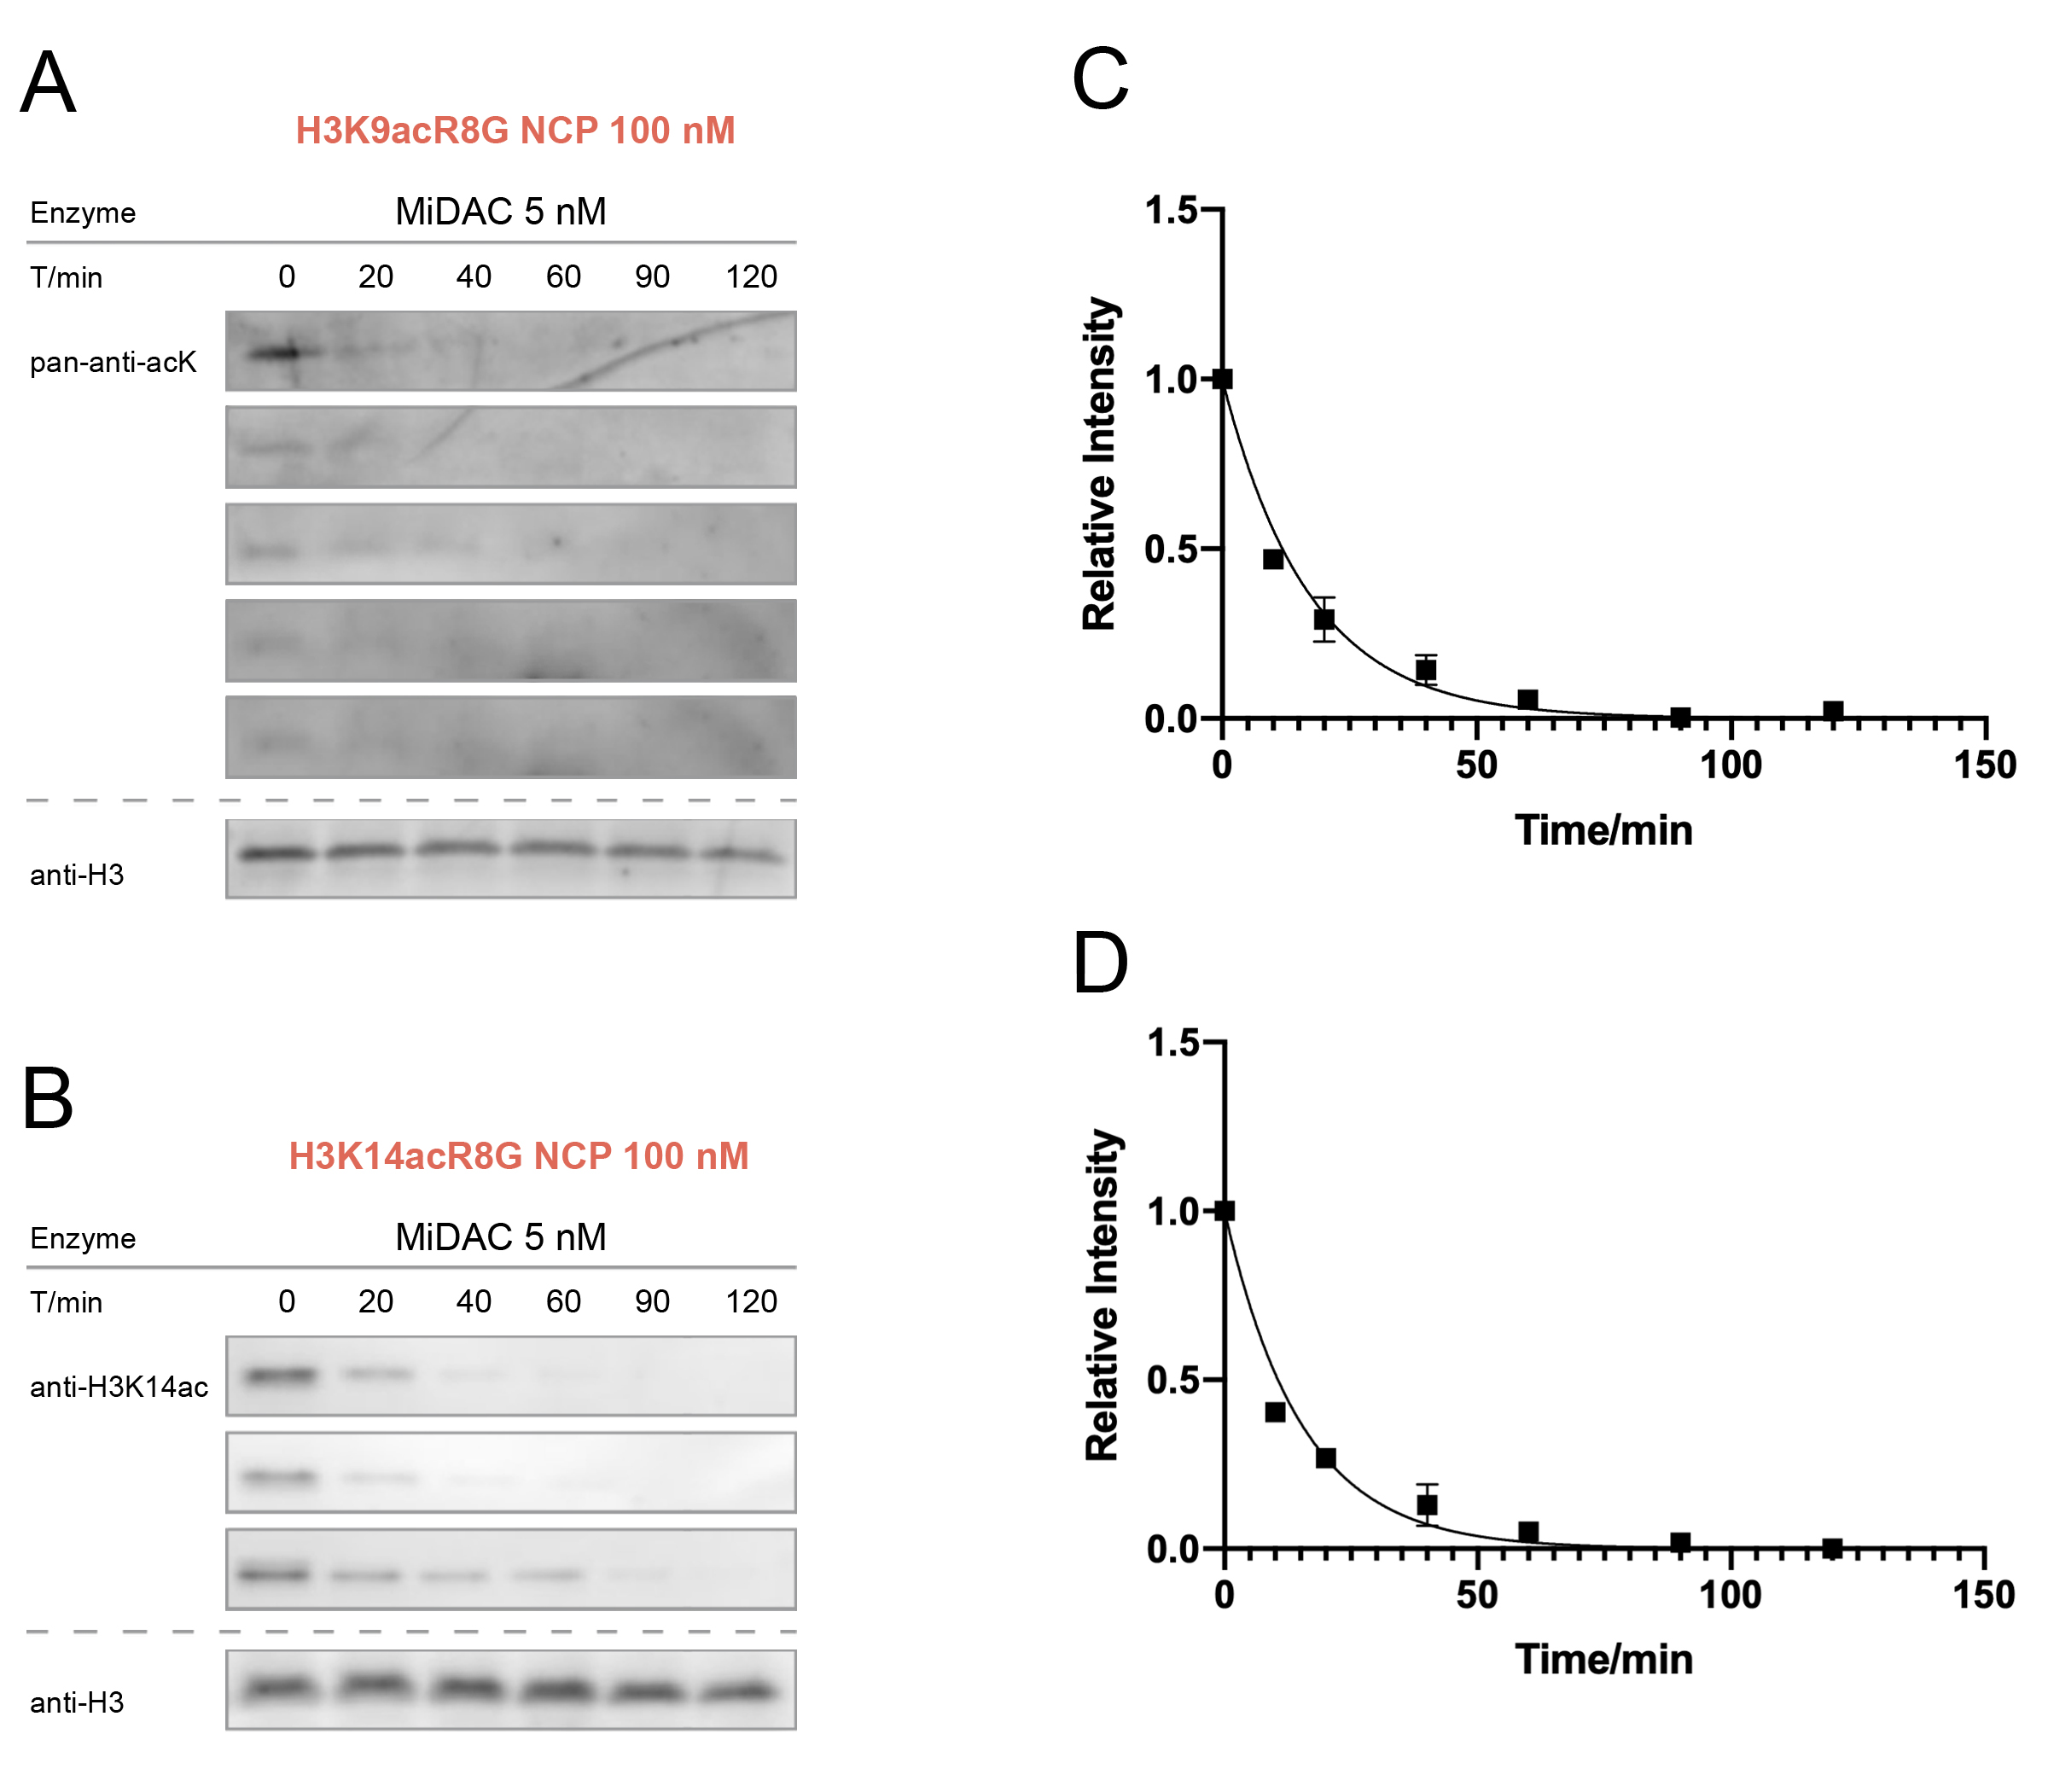

Supplement: supp [file elife-57663-supp-v1.zip › elife_poa_e57663_Figure_5_figure_supplement_3.jpg]

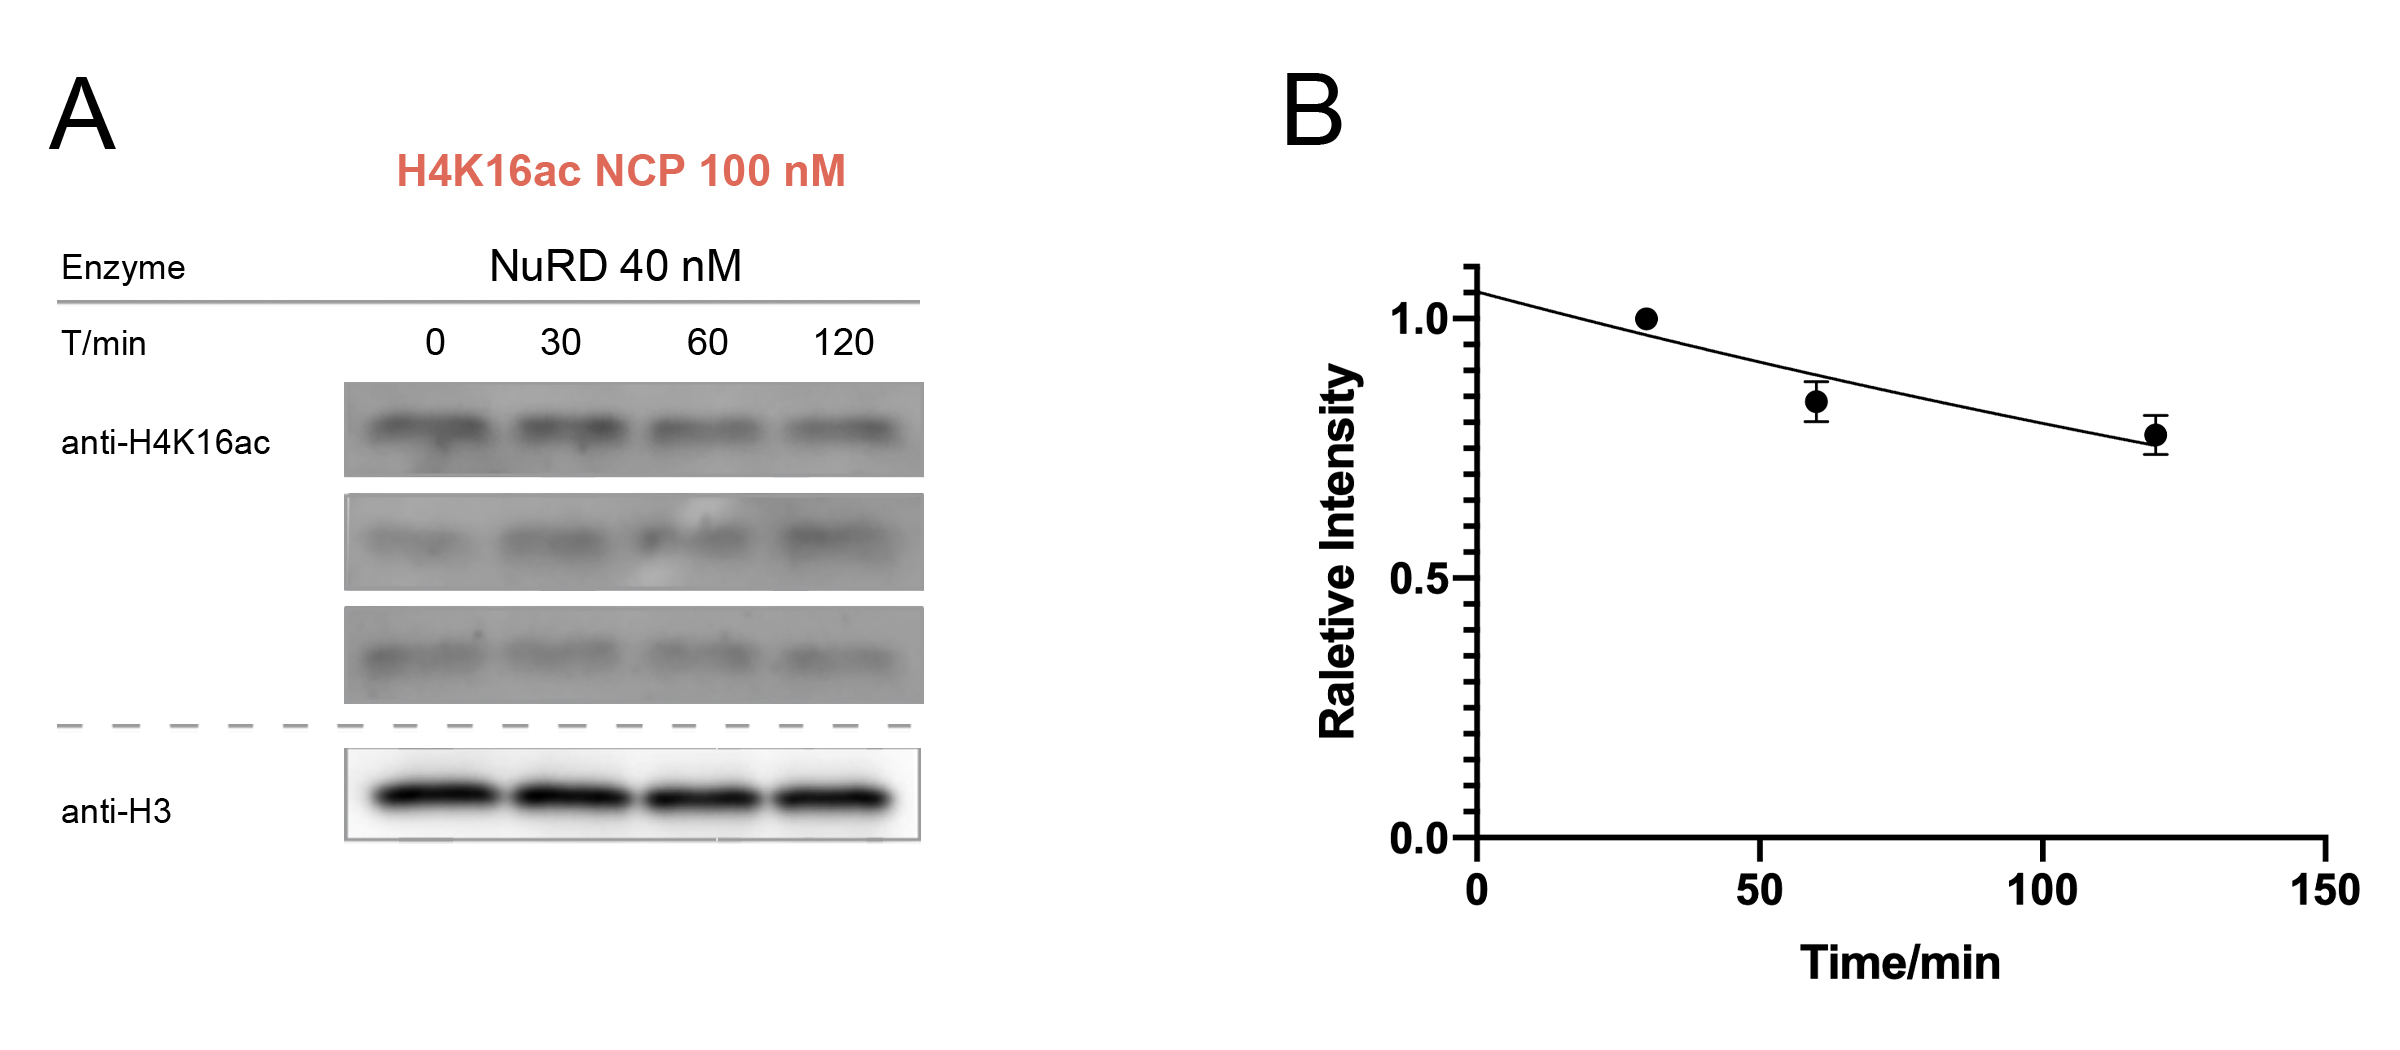

Supplement: supp [file elife-57663-supp-v1.zip › elife_poa_e57663_Figure_6_figure_supplement_1.jpg]
